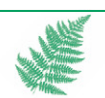

## Phylogenetic relationships and distribution of New World Melastomeae (Melastomataceae)

FABIÁN A. MICHELANGELI<sup>1\*</sup>, PAULO J. F. GUIMARAES<sup>2</sup>, DARIN S. PENNEYS<sup>3</sup>, FRANK ALMEDA<sup>3</sup> and RICARDO KRIEBEL<sup>1,4</sup>

<sup>1</sup>*The New York Botanical Garden, Bronx, NY 10458, USA*

<sup>2</sup>*Jardim Botânico de Rio de Janeiro, Rio de Janeiro, RJ Brazil*

<sup>3</sup>*The California Academy of Sciences, San Francisco, CA, USA*

<sup>4</sup>*The Graduate Center, City University of New York, New York, NY, USA*

*Received 1 December 2011; revised 17 June 2012; accepted for publication 24 July 2012*

In this study we present a phylogenetic analysis of Melastomeae, focusing on the Neotropical members of the tribe, a group of *c.* 70 species in 30 genera. In total, 236 species, including outgroups (Miconieae and Meranieae) and representatives of the Microlicieae and Rhexieae, were sequenced for the nuclear ribosomal internal transcribed spacer (nrITS), and the plastid spacers *accD-psaI* and *psbK-psbL*. Melastomeae are not resolved as monophyletic because a group of mostly herbs and small trees with mostly tetramerous flowers (*Acanthella*, *Aciotis*, *Acisanthera*, *Appendicularia*, *Comolia*, *Ernestia*, *Fritzschia*, *Marcetia*, *Macairea*, *Nepsera*, *Sandemania* and *Siphanthera*) is nested between Rhexieae and Microlicieae. The remaining New World Melastomeae are not resolved as monophyletic, because a group of Old World genera (*Osbeckia*, *Melastoma*, *Tristemma* and allied genera) are nested in the tribe. The large genus *Tibouchina* is not monophyletic because *Brachyotum*, *Bucquetia*, *Castratella*, *Centradenia*, *Chaetolepis*, *Heterocentron*, *Itatiaia*, *Microlepis*, *Monochaetum*, *Pilocosta*, *Svitramia*, and *Tibouchinopsis* are nested in it, even although all of these genera are recovered as monophyletic. Each major clade has remarkable habitat and geographical integrity. The clade formed by *Tibouchina* and allies appears to have arisen in savannas in lowland South America and later expanded to forest, campo and high Andean biomes. At least two groups have radiated in eastern Brazil, and two other groups in the Andes and mountains of Central America. Niche conservatism and colonization of adjacent environments seem to have driven speciation in Neotropical Melastomeae. © 2012 The Linnean Society of London, *Botanical Journal of the Linnean Society*, 2013, **171**, 38–60.

**ADDITIONAL KEYWORDS:** capsular fruit – Microlicieae – niche conservatism – Osbeckieae – Rhexieae – *Tibouchina*.

### INTRODUCTION

Phylogenetic analyses published over the last 10 years have shown that traditional tribal delimitations (e.g. Triana, 1871; Cogniaux, 1891; Renner, 1993) in Melastomataceae are unnatural and in need of revision (Clausing & Renner, 2001; Michelangeli *et al.*, 2004; Renner, 2004a; Amorim, Goldenberg & Michelangeli, 2009; Penneys *et al.*, 2010; Penneys & Judd, 2011). Most of these analyses also recovered a clade that groups the species with anthers with pedoconnectives and capsular fruits, corresponding to tribes Melastomeae, Microlicieae and Rhexieae.

However, generic and species sampling has been insufficient to fully assess the relationships among these tribes or to evaluate generic limits and relationships. This level of taxonomic confusion among Melastomeae, Rhexieae and Microlicieae is long-standing, as evidenced by the fact that every infrafamilial classification to date has differed on how these groups are related to each other and on the generic composition of each tribe (Candolle, 1828; Naudin, 1849–1853; Triana, 1871; Cogniaux, 1891; van Vliet, Koek-Noorman & Ter Welle, 1981; Renner, 1993). These differences have resulted from the relative importance that different authors have placed on calyx, stamen, ovary and seed morphology, biogeography and wood anatomy.

\*Corresponding author. E-mail: fabian@nybg.org

The lack of phylogenetic information for Melastomeae is unfortunate because, in Melastomataceae, a large amount of generic diversity (and therefore morphological diversity) is concentrated in the tribe. Melastomeae are pantropical, and include >870 species in 47 genera. The tribe is characterized by having stamens provided with a pedoconnective (poorly developed or reduced in some genera), appendages when they are present only ventral and paired, and capsular fruits that contain cochleate seeds with curved embryos. In Melastomeae, the majority of species are in South America (c. 570 species in 30 genera) (Renner, 1993), followed by Africa (c. 185 species) (Wickens, 1974; Jacques-Félix, 1994). Madagascar, India, Indonesia and Malaysia each have c. 50 species (Perrier de la Bâthie, 1934, 1951; Hansen, 1977; Hansen, 1992; Meyer, 2001; Renner *et al.*, 2001a) and the group extends, with four species each, into northern Australia (Whiffin, 1990) and Japan.

The 570 New World species are distributed among 30 genera that vary widely in size. *Tibouchina* Aubl. is the largest genus with 240 species, six others have 20–60 species and eight genera are monotypic. To date, <25% of the genera have been included in molecular analyses, and no genus has been represented by more than two species, thus making it impossible to evaluate the monophyly of currently recognized genera and phylogenetic relationships among them. The distribution patterns also make the New World Melastomeae a remarkable group. They range from Mexico, through the Antilles, south to Argentina, and from sea level to well above the tree line in the Andes and eastern Brazil. New World Melastomeae occupy a variety of forest and open vegetation types including lowland savannas, cerrados, campos rupestres, lowland and cloud forests, paramos and punas, and some species even grow in seasonally flooded habitats. In habit they vary from small annual herbs to medium-sized trees, although the majority of the species are shrubs or small trees. Such morphological and ecological diversity makes this group an ideal candidate in which to study morphological character evolution and a model system to track the establishment of different Neotropical vegetation types.

## MATERIAL AND METHODS

### TAXON SAMPLING

To study the phylogenetic relationships of taxa putatively assigned to Neotropical Melastomeae (*sensu* Renner, 1993), ingroup sampling in this analysis comprises 219 terminals (217 species) from 42 genera. Of these, 191 terminals from 32 genera correspond to

species found in the New World (25 genera out of 30 genera of Neotropical Melastomeae *sensu* Renner, 1993, plus seven genera from Rhexieae or of uncertain placement) and 28 species from ten genera from Asia, Australia and Africa (including Madagascar). Additionally, we included ten species from four genera of Microlicieae. We also included two species of *Cambessedesia* DC., a capsular-fruited Neotropical genus previously considered to be a member of Microlicieae, but that has been shown to fall outside that tribe (Fritsch *et al.*, 2004). Seven species of Miconieae (including the *Physeterostemon* R. Goldenb. & Amorim + *Eriocnema* Naudin clade) and Merianieae were used as outgroups; following previous family-wide analyses (Clausing & Renner, 2001; Renner, 2004a; Amorim *et al.*, 2009). Trees were rooted at the node that unites the latter two tribes.

### DNA EXTRACTION AND SEQUENCING

Total genomic DNA was isolated from silica-dried or herbarium material using the DNeasy plant mini kit from Qiagen and following the manufacturer's instructions. Some samples were isolated with modifications that have been shown to improve DNA quality and yield in Melastomataceae and/or with herbarium specimens, such as the addition of proteinase-K (30 µL per extraction to the lysis buffer) and/or β-mercaptoethanol (30 µL per extraction to the lysis buffer), with longer incubation periods at lower temperatures (6–24 h at 42 °C) (Martin *et al.*, 2008; Michelangeli *et al.*, 2008). In order to assess the phylogenetic relationships of Melastomeae, we sequenced one nuclear locus [the nuclear ribosomal internal transcribed spacer (nrITS) region] and two plastid spacers (*accD-psaI* and *psbK-psbL*). ITS has been used to elucidate phylogenetic relationships at the tribal and generic level in Melastomataceae (Michelangeli *et al.*, 2004, 2008; Ionta *et al.*, 2007; Goldenberg *et al.*, 2008) and we used the protocols outlined in those publications. The *psbK-psbL* spacer was amplified using primers designed by Kim-Joong Kim (Korea University, South Korea) and published by Reginato, Michelangeli & Goldenberg (2010), and the *accD-psaI* spacer was amplified using primers designed by Shaw *et al.* (2005). Protocols for amplifying the plastid markers were detailed in Reginato *et al.* (2010). Cycle sequencing was performed with the same forward and reverse primers used for amplification at the high-throughput sequencing service at the University of Washington (USA). Contigs were assembled with Sequencher 4.9 (GeneCodes Corp., Ann Arbor, MI, USA). Sequence alignment was performed with Clustal X (Thompson *et al.*, 1997) and manually adjusted in BioEdit (Hall, 2007).

## PYLOGENETIC ANALYSES

The separate nuclear and plastid data sets and the combined matrix were analysed using parsimony and maximum likelihood. The resulting topologies from the individual analyses were inspected by eye to discount the possibility of hard incongruence across data sets (i.e. support > 70% for placement of a taxon

in different clades or for relationships among major clades identified in Fig. 1).

Parsimony analyses were performed in Tree analysis using New Technology (TNT) (Goloboff, Farris & Nixon, 2008) after the indels were coded following the 'simple gap coding' procedure of Simmons & Ochoterena (2000) as implemented in 2xRead (Little, 2006). Tree searches were performed with 1000 random

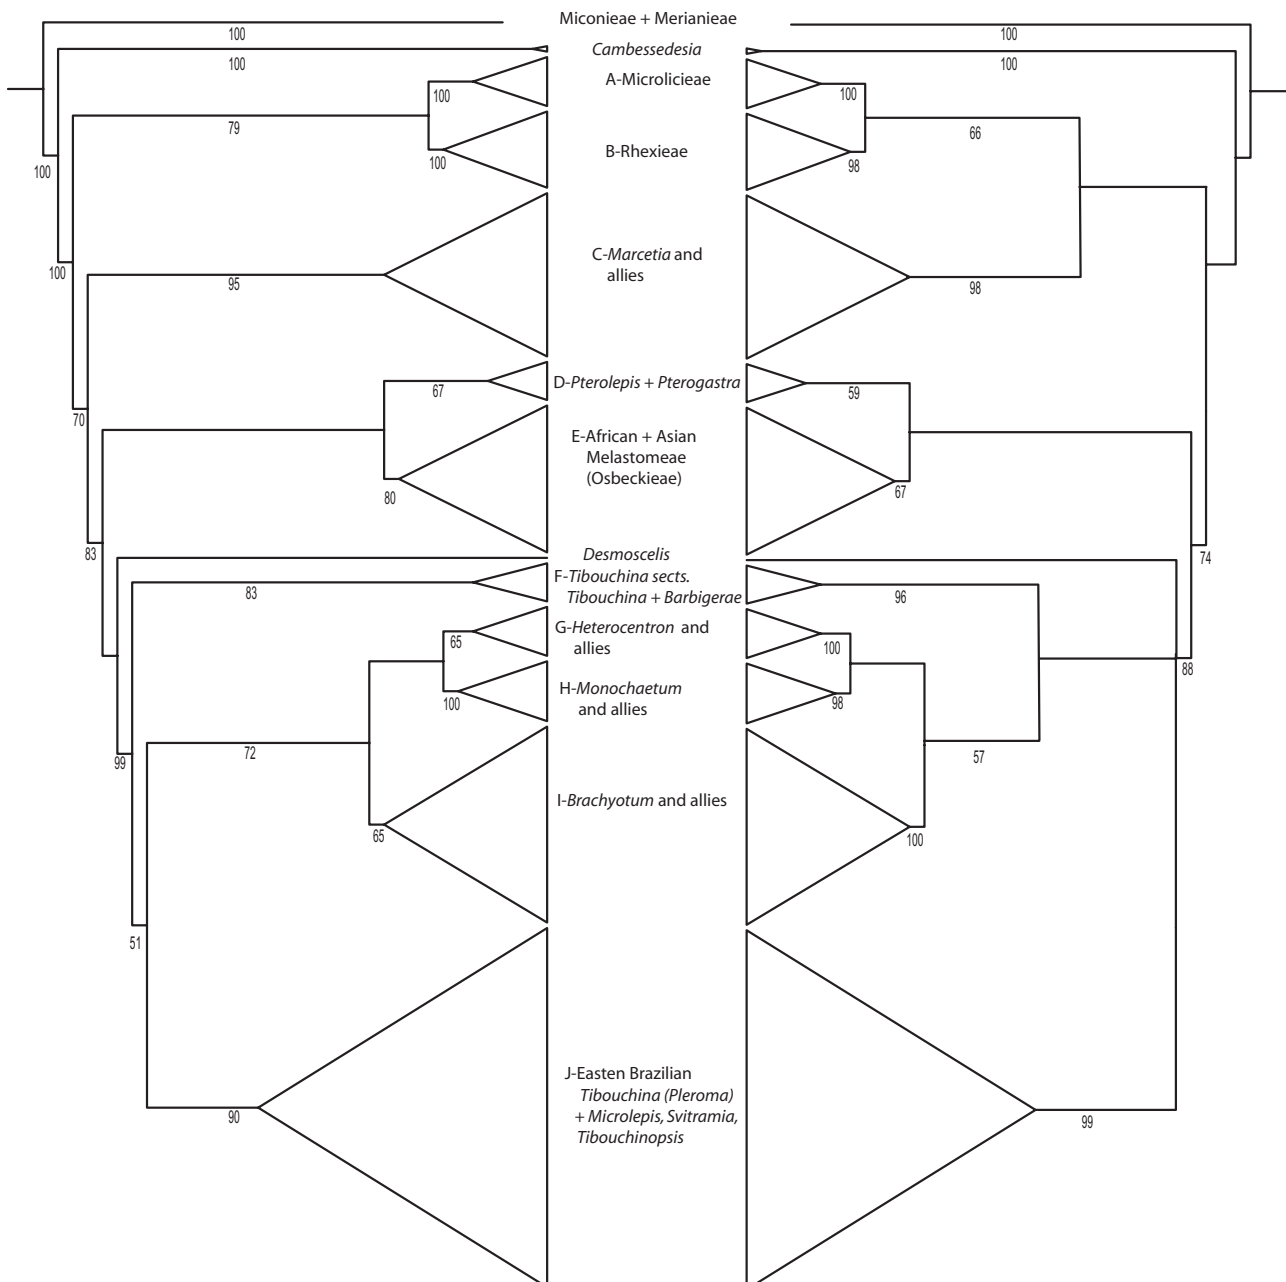

**Figure 1.** Summary of phylogenetic analyses of Melastomeae based on the combined nuclear (nrITS; 1197 bp), and plastid (*accd-psaI*; 1570 bp, and *psbK-psbL*; 666 bp) data sets. Maximum likelihood analysis (left) with bootstrap support values below branches. Maximum parsimony analysis (right) with jackknife support values below branches.

addition sequences, holding five trees per replicate. The resulting most-parsimonious trees were then swapped to completion. Clade support was calculated using the parsimony jackknife with 1000 replicates. Each replicate was performed with 20 random addition sequences and holding three trees. The strict consensus of each replicate was saved. Data editing and examination of phylogenetic trees was performed with WinClada (Nixon, 1999–2002). To ensure that the entire tree space had been searched, we also conducted a search using the parsimony ratchet (Nixon, 1999) as implemented in WinClada (Nixon, 1999–2002) and spawned to NONA (Goloboff, 1993). Three sequential runs were performed, each of them with 300 iterations, holding five trees per iteration and sampling 10% of the characters. The resulting most-parsimonious trees obtained were then swapped to completion. Maximum likelihood analyses and bootstrap were performed with RAxML using default parameters (Stamatakis, 2006; Stamatakis, Hoover & Rougemont, 2008), run through the Cypress Science Gateway (<http://www.phylo.org/>; Miller, Pfeiffer & Schwartz, 2010).

Morphological characters discussed in the text were taken from a data set developed for a forthcoming detailed study of *Tibouchina* and allies (P. J. F. Guimarães & F. A. Michelangeli, unpubl. data).

## RESULTS

Table 1 summarizes the number of taxa and the length and level of variation for the three loci included in this study. The Appendix contains all the voucher and GenBank accession information for the taxa included in this study. No strong topological incongruence was found for major clades when comparing the nuclear and plastid data.

Parsimony analyses resulted in > 100 000 trees (CI = 0.37, RI = 0.79). Fifty-one nodes collapsed in the strict consensus (not shown). Melastomeae *s.l.* (Renner, 1993) are not monophyletic in either the parsimony or maximum likelihood analyses (Fig. 1), as, in both cases, Microlicieae are nested in

Melastomeae. *Cambessedesia* is resolved as sister to all other Melastomeae + Microlicieae and Rhexieae. In both likelihood and parsimony analyses there are four well-supported clades excluding *Cambessedesia*: (clade A) Microlicieae (*sensu* Fritsch *et al.*, 2004), (clade B) a clade composed of *Rhexia* L., *Arthrostemma* DC. and *Pachyloma* DC. (Rhexieae), (clade C) a clade composed of *Acanthella* Hook.f., *Aciotis* D. Don, *Acisanthera* P. Browne, *Appendicularia* DC., *Comolia* DC., *Ernestia* DC., *Fritzschia* Cham., *Marcetia* DC., *Macairea* DC., *Nepsera* Naudin, *Sandemania* Gleason and *Siphanthera* Pohl ex DC. (from hereon called *Marcetia* and allies) and (clades D–J) a clade of ‘core Melastomeae’. The clade of core Melastomeae is composed of the Neotropical genera *Brachyotum* (DC.) Triana, *Bucquetia* DC., *Castratella* Naudin, *Centradenia* G. Don, *Chaetolepis* (DC.) Miq., *Desmoscelis* Naudin, *Heterocentron* Hook. & Arn., *Itatiaia* Ule, *Microlepis* (DC.) Miq., *Monochaetum* (DC.) Naudin, *Pilocosta* Almeda & Whiffin, *Pterolepis* (DC.) Miq., *Pterogastra* Naudin, *Svitramia* Cham., *Tibouchina* Aubl. and *Tibouchinopsis* Markgr. Additionally, in the Neotropical Melastomeae are nested all the Old World members of the tribe sampled in this study [*Amphorocalyx* Baker, *Antherotoma* (Naudin) Hook.f., *Dichaetanthera* Endl., *Dionycha* Naudin, *Dissotis* Benth., *Guyonia* Naudin, *Heterotis* Benth., *Melastoma* L., *Osbeckia* L. and *Rousseauxia* DC.; i.e., Osbeckieae *p.p.*, *sensu* Cogniaux, 1891], forming a single clade (clade E).

Parsimony and likelihood analyses differ in the relationships among these main four clades, with *Marcetia* and allies (Figs 1–2, clade C) resolved as sister to Rhexieae + Microlicieae in the maximum parsimony (MP) analysis (Figs 1–2, clades A–B) and as sister to core Melastomeae in the maximum likelihood (ML) analysis (Figs 1–2, clades D–J). However, this relationship lacks support in the MP analysis and has only moderate support in the ML analysis. In core Melastomeae, there are three distinct clades: *Pterogastra* + *Pterolepis* (Figs 1–2, clade D), Old World Melastomeae (Figs 1–2, clade E) and New World *Tibouchina* and allied genera (Figs 1–2; clades

**Table 1.** Aligned length, indels and informative characters for the three loci sequenced

| Loci             | Taxa sampled | Aligned base pairs | Potentially informative | Indels | Potentially informative indels | Total potentially informative characters |
|------------------|--------------|--------------------|-------------------------|--------|--------------------------------|------------------------------------------|
| nrITS            | 234          | 1197               | 518                     | 378    | 175                            | 693                                      |
| <i>accD-psaI</i> | 211          | 1570               | 458                     | 298    | 144                            | 602                                      |
| <i>psbK-psbL</i> | 212          | 666                | 251                     | 179    | 89                             | 340                                      |
| Total            | 236          | 3433               | 1227                    | 855    | 408                            | 1635                                     |



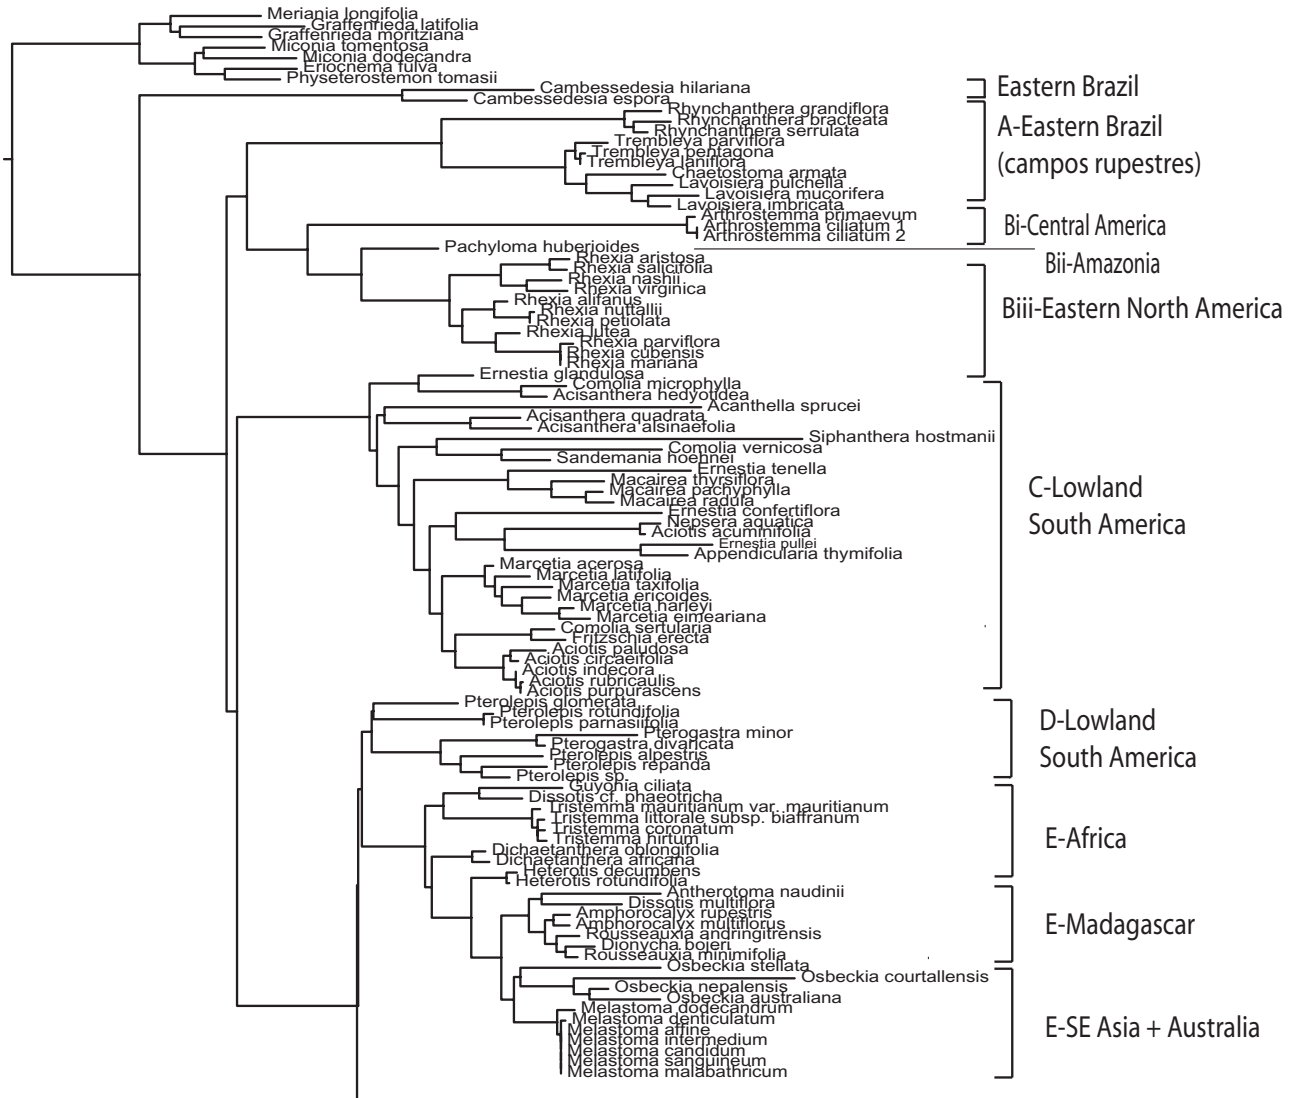

To fig. 2B

**Figure 2.** A, estimation of phylogenetic relationships in Melastomeae. Maximum likelihood analysis of combined nuclear (nrITS) and plastid (*accD-psaI*, *psbK-psbL*) data sets, with geographical distribution of each clade. See Figure 1 for support values of major clades. B, continuation of Figure 2A, estimation of phylogenetic relationships in Melastomeae. Maximum likelihood analysis of combined nuclear (nrITS) and plastid (*accD-psaI*, *psbK-psbL*) data sets, with geographical distribution of each clade. See Figure 1 for support values of major clades.

F–J). *Pterogastra* + *Pterolepis* are resolved as sister to the Old World Melastomeae, and together these clades are sister to *Tibouchina* and allies.

In the *Tibouchina* and allies clade (Figs 1–2; clades F–J), *Desmoscelis* is resolved either as the first diverging branch, or as part of a basal polytomy. Above *Desmoscelis*, the large genus *Tibouchina* is not recovered as monophyletic, as several smaller genera are nested in it, although the majority of these genera are recovered as monophyletic. Within this clade there are five well-supported groups: F – *Tibouchina* sections *Tibouchina* and *Barbigerae* (Naud.) Cogn.; G – *Hetero-*

*centron*, *Centradenia* and *Pilocosta* (with one species of *Tibouchina*); H – *Monochaetum*, *Bucquetia*, *Chaetolepis* and *Castratella*. I – *Brachyotum* and members of *Tibouchina* sections *Simplicicaulis* (Naudin) Cogn., *Pseudopterolepis* Cogn. and *Lepidotae* Cogn. and some members of sections *Diotanthera* (Triana) Cogn. and *Purpurella* (Naudin) Cogn.; and J – eastern Brazilian *Tibouchina*, i.e. *Tibouchina* sections *Pleroma* (D. Don) Cogn., *Diplostegia* (D. Don) Cogn., *Involucrales* Triana and the remainder of section *Diotanthera* and *Purpurella*, with the genera *Itatiaia*, *Microlepis*, *Svitramia* and *Tibouchinopsis* (Fig. 2B).



## DISCUSSION

New World Melastomeae, as currently defined (Renner, 1993), are not resolved as monophyletic, because *Rhexia*, tribe Microlicieae and Palaeotropical Melastomeae are nested in it. Although these results are incongruent with the traditional tribal classification of the family (Triana, 1871; Cogniaux, 1891) and more recent realignments (van Vliet *et al.*, 1981; Renner, 1993), four major clades that have been identified in previous molecular phylogenetic studies (Clausing & Renner, 2001; Renner, 2004a, b) are also recovered here, with a significantly increased sampling, i.e. *Marcetia* and allies, an expanded Rhexieae, Microlicieae and core Melastomeae. These four major clades are united by the presence of anthers with well-developed pedoconnectives (although these have been lost a number of times; see below) as previously shown in other molecular systematic studies (Clausing & Renner, 2001; Renner & Meyer, 2001; Renner, 2004a). Additionally, all of these groups except Microlicieae have cochleate seeds (with further modifications in some genera; see below).

## MICROLICIEAE

Results of this study are in agreement with Fritsch *et al.* (2004) regarding a reduced generic composition of Microlicieae, including only *Chaetostoma*, *Lavoisiera*, *Microlicia*, *Rhynchanthera*, *Stenodon* and *Trembleya* (Fig. 2A, clade A). Likewise, the former study removed *Cambessedesia*, *Eriocnema*, *Siphanthera* and *Castratella* from their 'core Microlicieae.' Microlicieae are supported by reniform, ellipsoid or elongate seeds with a foveolate or reticulate testa (Almeda & Martins, 2001; Fritsch *et al.*, 2004) and the absence of a staminal dorsal vascular bundle (Wilson, 1950; P. J. F. Guimaraes, K. Sosa, R. Kriebel & F. A. Michelangeli, unpublished data). Most species also have rostrate anthers with a ventrally oriented terminal pore, but rostrate anthers are also present in some *Acisanthera*, *Siphanthera* and *Tibouchina*. Additionally, if ventral connective appendages are present in the stamens, these are always vascularized, a trait otherwise only found in *Arthrostemma* (Wilson, 1950). This character probably evolved in the ancestor of Rhexieae + Microlicieae and was later lost in *Pachyloma* and *Rhexia*, which have reduced ventral staminal appendages. In most genera, the anthers are also unique in having long pedoconnectives with short thecae, a character combination not seen in other groups with pedoconnectives. *Chaetostoma*, however, has some species with long anthers and a greatly reduced pedoconnective (Koschnitzke & Martins, 1999, 2006; Fritsch *et al.*, 2004). Polysporangiate anthers have been reported in some species of *Microlicia*

and *Chaetostoma* (Baumgratz *et al.*, 1996; Almeda & Martins, 2001), and may be a synapomorphy for these two genera. For details on the systematics and biogeography of Microlicieae see Fritsch *et al.* (2004).

## RHEXIEAE

*Rhexia*, *Arthrostemma* and *Pachyloma* form a clade distinct from core Melastomeae (Fig. 2A, clade B). These genera of herbs and shrubs have tetramerous flowers and cochleate, costate seeds that are tuberculate or rugose. Unlike core Melastomeae, in which the tuberculae are composed of a single cell, in these genera the tuberculae are composed of several cells (Whiffin & Tomb, 1972; Renner & Meyer, 2001). In all three genera, the ovaries lack apical projections. Anthers in this clade are widely variable, but in all genera (but not all species) the anthers have dorsal connective appendages. In *Pachyloma* the anthers have a long dorsal appendage and two ventral appendages that are not vascularized, whereas *Arthrostemma* has two vascularized ventral appendages and a short or absent dorsal appendage (Gleason, 1929; Wilson, 1950). Both of these genera have well-developed pedoconnectives. In contrast, *Rhexia* lacks pedoconnectives and either has short dorsal appendages or lacks them altogether (Wilson, 1950; Kral & Bostick, 1969; Ionta *et al.*, 2007). Additionally, *Rhexia* can be distinguished by its constricted hypanthia (in Neotropical capsular-fruited genera, otherwise restricted to the small genus *Poteranthera* Bong.), ovary locules opposite the petals (they are alternating in most Melastomataceae where the number of petals is the same as the number of ovary locules) and unilocular anthers (Ionta *et al.*, 2007). In spite of the differences in anther morphology, Gleason (1929) postulated that *Pachyloma* was closely related to *Rhexia* (and *Monochaetum*, see below), based on the presence of stamens with dorsal appendages and their seed morphology, but he seems to have missed the connection with *Arthrostemma*.

## MARCETIA ALLIANCE

Most genera in the clade comprising *Marcetia* and allies [Fig. 2A, clade C; *Acanthella*, *Aciotis* (Fig. 3A), *Acisanthera*, *Appendicularia*, *Comolia*, *Ernestia*, *Fritschia*, *Marcetia* (Fig. 3B), *Macairea*, *Nepsera* (Fig. 3C), *Sandemania* and *Siphanthera*], were traditionally placed in Melastomeae based on anther and fruit morphology. Most of the species in this group are herbs or small shrubs, and the annual habit, although rare in the family, has appeared repeatedly in this group (Freire-Fierro, 2002; Almeda & Robinson, 2011; Kriebel, 2012). Additionally, some species of *Macairea*



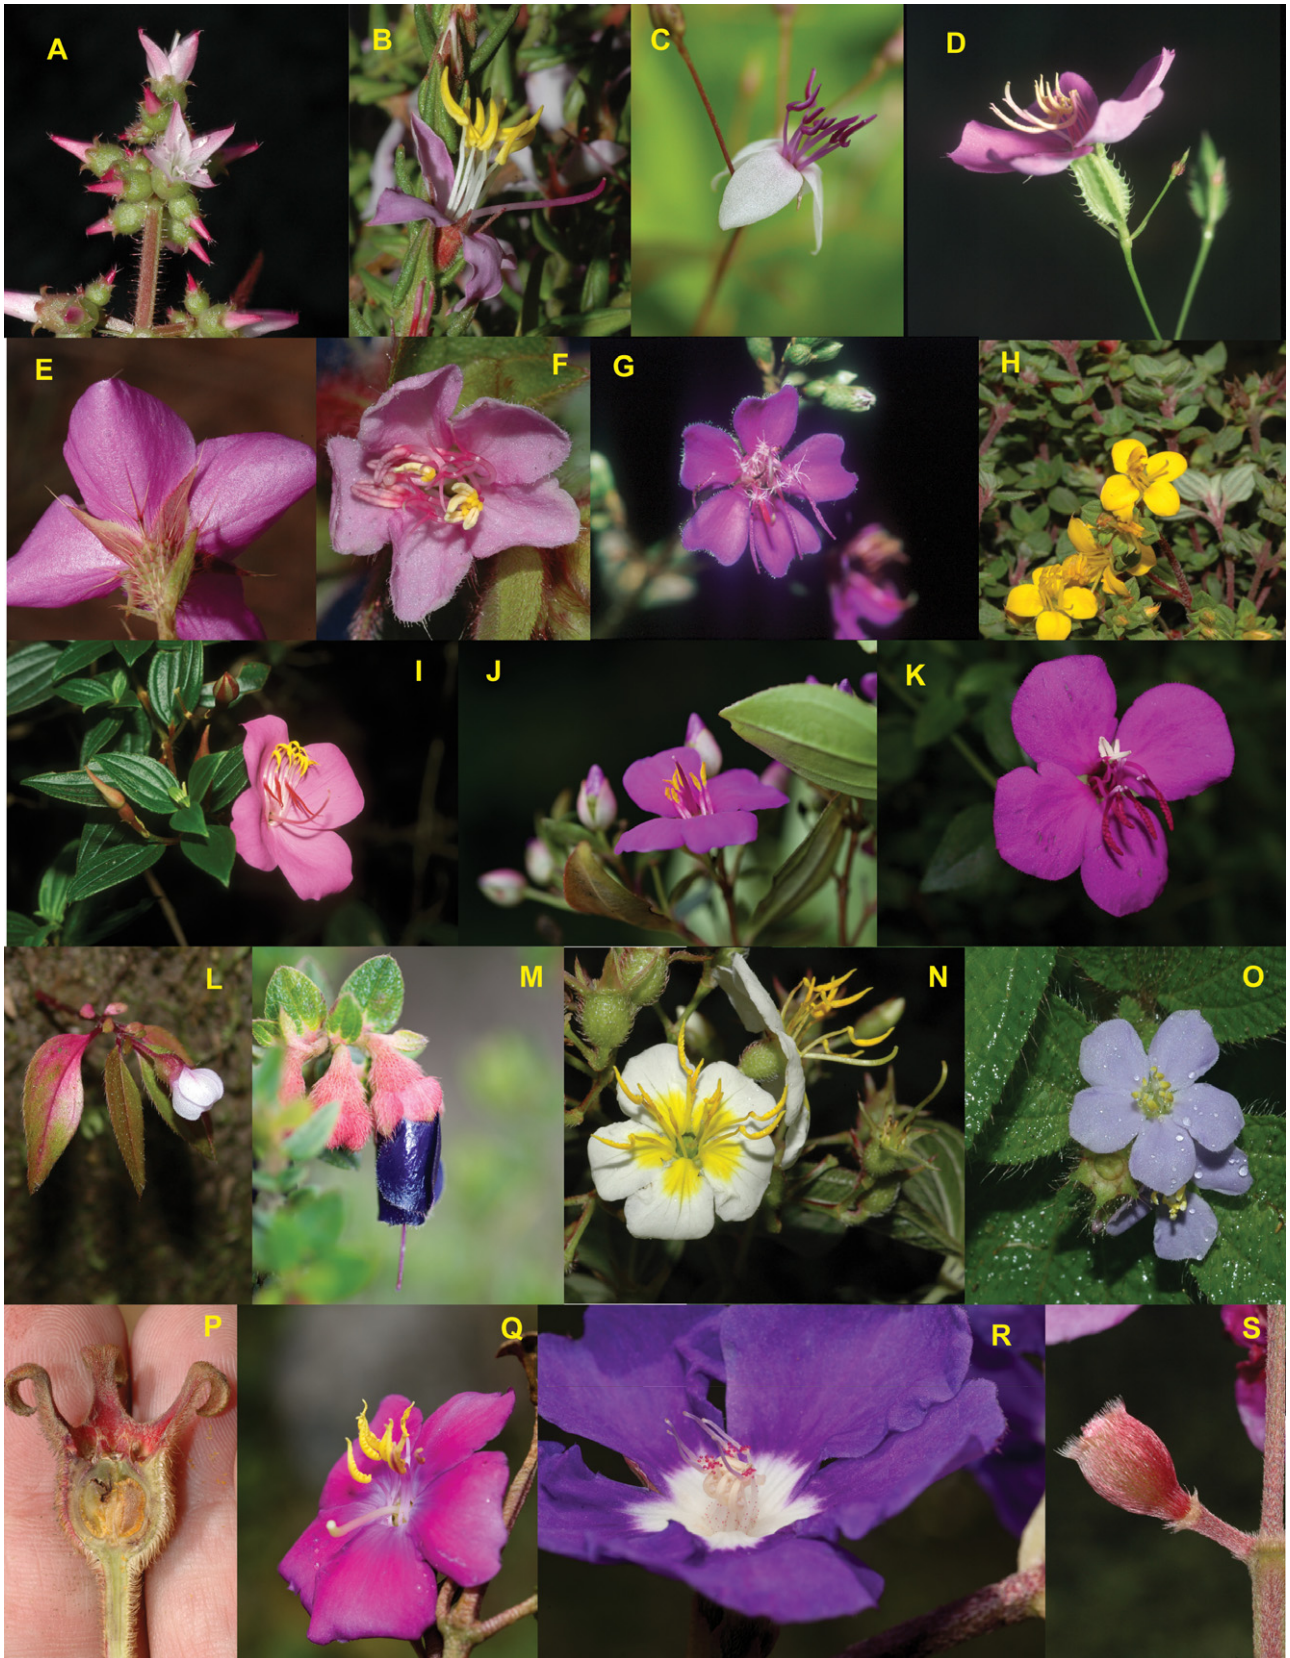

Figure 3. See caption on next page.



**Figure 3.** Representatives of Neotropical Melastomeae. A, *Aciotis paludosa*. B, *Nepsera aquatica*. C, *Marcetia taxifolia*. D, *Pterogastra divaricata*. E, *Pterolepis* sp., notice intercalycine emergence (against petal). F, *Desmoscelis villosa*. G, *Tibouchina bipenicillata* (section *Barbigerae*). H, *Chaetolepis microphylla*. I, *Monochetum humboldtianum*. J, *Bucquetia glutinosa*. K, *Heterocetron elegans*. L, *Centradenia inaequilateralis*. M, *Brachyotum strigosum*. N, *Tibouchina gayana* (section *Diotanthera*, from the Andes). O, *Tibouchina clinopodifolia* (section *Purpurella* from eastern Brazil). P, *Tibouchina bicolor* (section *Diotanthera* from the Andes), longitudinal section, showing persistent calyx and ovary with apical appendages. Q, *Tibouchina lepidota* (section *Lepidotae*). R, *Tibouchina heteromalla* (section *Pleroma*). S, *Tibouchina stenocarpa* (section *Pleroma*), fruit with caducous calyx. (All pictures by F. A. Michelangeli.).

are trees up to 12 m tall (Renner, 1989). This clade is further characterized by tetramerous flowers (Fig. 3A–C) (although pentamerous flowers are present in *Acisanthera* and *Ernestia cordifolia* O.Berg ex Triana) and ovaries that are either glabrous or with glandular trichomes at the apex, but that lack appendages (see below). In *Marcetia*, *Aciotis*, *Fritzschia*, *Siphanthera* and *Nepsera*, the pedoconnectives are small or lacking and connective appendages are absent (Fig. 3A–C). All genera sampled in this clade have seeds that are cochleate, ovate or lacrimiform. With the exception of *Siphanthera*, all these genera also have seeds with foveolate testas (Whiffin & Tomb, 1972). In some cases, these features can be obscured by the presence of tubercles or secondary sculpturing, but the foveolate nature is evident at least near the raphe. All of these genera were classified by Whiffin & Tomb (1972) as having a microliticoid seed type, not the typical tibouchinoid type of other Melastomeae. The number of ovary locules can be equal to the number of petals (usually four), but several taxa have a reduced number of locules, a condition also common in Microlicieae, but not common in Palaeotropical Melastomeae or the *Tibouchina* and allies group. Lastly, all of these species, except *Acanthella sprucei* Hook.f and *Acisanthera hedyotoidea* (C.Presl) Triana, have a deletion of 381 bp in the *psbK-psbL* spacer.

Generic limits in some elements of the *Marcetia* alliance have been notoriously difficult, especially between *Comolia* and *Ernestia*. Sampling in this investigation is insufficient to resolve the problematic generic circumscriptions in this clade, but results suggest (Fig. 2A) that *Macairea* and *Marcetia* are monophyletic. Almeda & Robinson (2011) demonstrated the monophyly of *Siphanthera* using morphological data; Almeda & Martins (2001) had previously removed it from Microlicieae on the basis of seed morphology, and that result is confirmed here. *Aciotis* might be rendered monophyletic with some small adjustments. *Poteranthera* and *Mallophyton* were not sampled in this study, but, based on the presence of tetramerous flowers, ovary apex without a corona or hairs and seed morphology, they are likely to belong to the *Marcetia* alliance (Wurdack, 1964; Kriebel, 2012). *Loricalepis* Brade, a monotypic genus of small

shrubs with tetramerous flowers and white petals from northern Brazil (Brade, 1958), may also be in this clade.

#### CORE MELASTOMEAE

The largest group in number of genera and species is what we have designated core Melastomeae (Fig. 2B, clades D–J). Putative morphological synapomorphies for this pantropical clade include cochleate seeds with tubercles or papillae composed of a single cell (tibouchinoid seeds *sensu* Whiffin & Tomb, 1972), a crown of hairs or appendages on the ovary apex (Fig. 3P) and the presence of staminal pedoconnectives with bifurcated dorsal vascular bundles (Wilson, 1950; P. J. F. Guimaraes, K. Sosa, R. Kriebel & F. A. Michelangeli, unpubl. data).

*Pterogastra* and *Pterolepis* form a strongly supported clade sharing several plesiomorphic characters, but there are no clear synapomorphies for this group (Fig. 2A, clade D). Both genera have tetra- and pentamerous species, herbaceous to suffruticose habit, dimorphic stamens with developed pedoconnectives and short, bilobed ventral appendages (Fig. 3D–E) (Renner, 1994a, b). They also have emergences or trichomes in the calyx sinuses, but these differ between them. In *Pterolepis* the intercalycine emergences are stellate–penicillate (Fig. 3E), whereas they are slender and simple in *Pterogastra*. Intercalycine emergences are also present in some *Chaetolepis*, *Tibouchina* and Palaeotropical Melastomeae (see below). *Pterogastra* has prominently ribbed or winged hypanthia, but this homoplasious character is also present in *Schwackaea* Cogn. and *Pilocosta* Ameda & Whiffin (see below) (Renner, 1994b). Unlike *Pterogastra*, the latter two genera have the same number of wings as sepals (instead of double). In *Schwackaea* the hypanthium is terete and in *Pilocosta* it is quadrangular. Although the hypanthia in *Pterolepis* are not winged, they can be slightly angular, especially in fruit. Some Palaeotropical Melastomeae also have intercalycine emergences, and these are similar to those found in *Pterolepis*. However, this character cannot be used as diagnostic of the Palaeotropical clade, because it is absent in some genera (i.e. *Guyonia*, *Dichaetanthera* and *Tristemma*).

Additionally, some Palaeotropical Melastomeae have persistent fleshy placentas, and some species even have berries (mostly in *Melastoma*) (Clausing, Meyer & Renner, 2000; Clausing & Renner, 2001).

Although *Tibouchina* is not resolved as monophyletic, the groups in this large clade (Fig. 2B, clades F–J) are each well characterized by stamen and hypanthium morphology, and biogeography (see below). This large assemblage of Neotropical genera is well supported by molecular analyses, but morphological synapomorphies are not readily evident. *Desmoscelis* (Fig. 3F), the first diverging group of *Tibouchina* and allies, is a genus of two species from lowland savannas. It is characterized by its erect, herbaceous habit, pentamerous flowers, long simple (eglandular or glandular) trichomes and dimorphic anthers with long, paired ventral connective appendages. The larger anthers are slender and subulate, whereas the smaller ones are short, truncate and with a broad pore. These characters are plesiomorphic in core Melastomeae or autapomorphic for *Desmoscelis*.

The species of *Tibouchina* sections *Tibouchina* and *Barbigerae* (Fig. 2B, clade F) have pink to purple anthers without glandular trichomes (Fig. 3G). In section *Barbigerae* the union between the filament and the connective has simple, long trichomes. The hypanthium in section *Tibouchina* has tufts of simple hairs in the calyx sinuses, but whether or not these structures are homologous to the intercalycine emergences of *Pterolepis* and Palaeotropical Melastomeae is hard to assess without a detailed study of these structures and better resolution in that section of the estimated phylogeny.

*Heterocentron*, *Pilocosta* and *Centradenia* (Fig. 2B, clade G) are herbs or small shrubs (sprawling in the case of *Pilocosta* and a few species of *Heterocentron*) with tetramerous flowers and tetralocular ovaries (Fig. 3 K–L). Species in this clade have stamens that are almost always dimorphic with well-developed pedoconnectives and ventral appendages that are usually bilobed in the larger series (Whiffin, 1972; Almeda, 1977, 1993; Almeda & Whiffin, 1980). Each of these genera are resolved as monophyletic (Fig. 2B, clade G), and characters of hypanthium shape and leaf and anther morphology support the recognition of each of them as separate. *Tibouchina breedlovei* Wurdack, a rarely collected species from southern Mexico, is also placed in this clade. This species also has tetramerous flowers and anthers that closely resemble those of *Heterocentron*. In the original description, Wurdack (1967) suggested that *T. breedlovei* could be placed near or in *Heterocentron*. Most *Heterocentron* spp. have penninerved venation (Whiffin, 1972), a character otherwise rare in the family, and all species of *Centradenia* have asymmetrical leaves, also rare in the family (Almeda,

1977). *Schwackaea*, a monotypic genus ranging from Mexico to north-western Colombia, shares all these features (Renner, 1994b), and recent DNA data confirm this placement (D. S. Penneys, F. Almeda, P. W. Fritsch & F. A. Michelangeli, unpubl. data).

The group formed by *Monochaetum*, *Chaetolepis*, *Castratella* and *Bucquetia* (Fig. 2H), like the *Heterocentron* group, share tetramerous flowers with tetralocular ovaries. *Chaetolepis*, *Castratella* and *Bucquetia* have isomorphic, linear anthers without pedoconnectives or well-developed appendages (Fig. 3H–J). *Monochaetum*, however, has well-developed dorsal appendages, at least in the largest set of stamens (Fig. 3I). Some *Monochaetum* spp. have one whorl of stamens reduced to staminodia, or even lack them, and the species in the genus exhibit a high degree of variation in the size of the pedoconnective. In most Melastomataceae with stamen dimorphism, the larger series of stamens is usually opposite the calyx, with the reduced series opposite the petals, but in *Monochaetum* this situation is reversed (Almeda, 1978). *Bucquetia* and *Castratella* had been placed in Microlicieae (Cogniaux, 1891), but seed morphology clearly excluded them from this group (Whiffin & Tomb, 1972; Fritsch *et al.*, 2004).

*Brachyotum* is characterized by pendant flowers with copious nectar, in which the dark purple or yellow to greenish petals are pseudocampanulate (Fig. 3 M). The pedoconnective is highly reduced in this group, and the entire genus is pollinated by birds, mostly hummingbirds (Wurdack, 1953; Vogel, 1958; Stiles, Ayala & Giron, 1992), although bat pollination may also be possible. At least one *Tibouchina* sp. in this clade [*T. grossa* (L.f.) Cogn.] also produces nectar, and it is visited by bats (Vogel, 1958, 1997) and hummingbirds (K. Schumman, pers. comm. cited in von Helversen & Winter, 2003). However *T. grossa* lacks pendant flowers with closed petals that have traditionally defined *Brachyotum*, and has a base chromosome number of  $x = 10$  instead of  $x = 9$  (Solt & Wurdack, 1980). *Brachyotum* is nested among representatives of *Tibouchina* that generally have yellow or white anthers, and many of them also have reduced pedoconnectives (Fig. 3N–Q). In this *Brachyotum* clade, those species with tetramerous flowers (*Tibouchina* section *Pseudopterolespis*) are resolved as a unit, as are the species with lepidote scales on the hypanthium, free bracteoles and glabrous stamens (*Tibouchina* section *Lepidotae*; Fig. 3Q) (Todzia & Almeda, 1991). This clade also contains the majority of the species of *Tibouchina* section *Diotanthera*, characterized by attenuate anthers and persistent calyx lobes (Fig. 3P) (Cogniaux, 1891; Todzia, 1999). Several species in section *Diotanthera* also have bicoloured petals (Fig. 3N). Based on anther and calyx morphology, we expect several Mexican and Central

American species that were not sampled in this study (Todzia, 1999) to fall within this clade.

The *Pleroma* group (Fig. 2B, clade J) is characterized by species with a calyx that is caducous in fruit (Fig. 3S) (Guimaraes & Martins, 1997). Most species in this group have well-developed pedoconnectives, purple, pink or white anthers, and if the anther connectives have trichomes these are glandular (Fig. 3R) (Cogniaux, 1891; Guimaraes & Martins, 1997). Most species are pentamerous, but some *Tibouchina* with small flowers are tetramerous. The *Pleroma* clade also includes four genera that have been maintained separate from *Tibouchina* (*Itatiaia*, *Microlepis*, *Svitramia* and *Tibouchinopsis*); these genera have persistent calyces (Triana, 1871; Ule, 1908; Brade & Markgraf, 1961; Romero & Martins, 2003), a character difference that may be responsible for all of these groups not being recognized as part of *Tibouchina*. Additionally, *Svitramia* has reduced anthers that lack pedoconnectives and have highly reduced or absent ventral appendages (Romero & Martins, 2003).

#### TRIBAL AND GENERIC TAXONOMY

This study contains more than 14 times the number of species of Melastomeae and three times the number of genera included in any previous published molecular study of Melastomataceae. Many of the generic groupings shown here are consistent with those studies, but, as a result of increased generic and specific sampling, a clearer picture of the evolution of the capsular taxa with pedoconnectives in Melastomataceae is starting to emerge, with some new groups clearly identified (i.e. *Marcetia* and allies, the affinities of *Monochaetum* with other high Andean taxa, the composition of Rhexieae, etc.). Additionally, this study represents the first insight into the relationships in the large and complex genus *Tibouchina* and between *Tibouchina* and other Neotropical Melastomeae. However, the level of sampling of some groups (particularly *Ernestia*, *Comolia* and Central American and Mexican representatives of *Tibouchina*) and the level of resolution and support along the spine of the tree stills makes it premature to propose any overhaul of the taxonomy. For example, whether *Marcetia* and allies, or the *Pterogastra* clade, deserve tribal recognition will depend on the final resolution of the relationships between this latter group and Palaeotropical Melastomeae, or the relationships between the Rhexieae and *Marcetia* clades. Similarly, *Tibouchina* could be recognized as a much expanded genus (but, as noted above, there are no clear morphological synapomorphies for this clade) or all the other genera maintained and *Tibouchina* divided into smaller and diagnosable units. The

*Tibouchina* and allies clade is already the subject of a more detailed study that includes additional species, markers and a morphological matrix (P. J. F. Guimaraes, K. Sosa, R. Kriebel & F. A. Michelangeli, unpubl. data), and these open questions will be addressed in forthcoming publications.

The fact that many groupings at the generic or sectional level are recovered here as monophyletic, or nearly so, is evidence that characters traditionally used in Melastomeae taxonomy, such as androecium morphology, merosity, seed morphology, calyx persistence and hypanthium indument (Naudin, 1849–1853; Triana, 1871; Cogniaux, 1885, 1891; Whiffin & Tomb, 1972; Wurdack, 1986), are good predictors of phylogenetic relationships. The presence/absence of a corona on the ovary apex (core Melastomeae vs. Microlicieae + Rhexieae + *Marcetia* alliance), and the difference between ventral staminal appendages with or without vascular bundles (Microlicieae + *Arthrostemma* vs. *Marcetia* alliance and core Melastomeae) have not traditionally been used for taxonomic purposes and are shown here as a taxonomically important characters. *Tibouchina*, as currently defined, is not resolved as a monophyletic group, mostly because it is defined by characters that are plesiomorphic in core Melastomeae: pentamerous flowers with anthers with developed pedoconnectives and shortly bilobed ventral anther appendages.

#### HABITAT AND DISTRIBUTION

As shown for other groups of Melastomataceae (Fritsch *et al.*, 2004; Renner, 2004a; Penneys & Judd, 2005; Michelangeli *et al.*, 2008), even if the generic or tribal classification does not closely match phylogenetic results, there is a close correspondence between most clades recovered and the geographical distribution or type of environment in which the plants live (Fig. 2).

Although a minority of outlying taxa are native to areas north of South America, most species of the *Marcetia* and allies clade are distributed in central and north-eastern South America. Most are found in open habitats, in either successional or ruderal environments, savannas, campo rupestres and the Guayana highlands. Some, mostly widespread, species reach the Antilles and the Andes.

Microlicieae are almost exclusively found in eastern and central Brazil in campos rupestres. A few *Rhynchanthera* spp. are found farther to the north and south-west and in wetter environments, and one *Microlicia* sp. is found in the Guayana Highlands. The geographical distribution of this group has already been examined in detail by Fritsch *et al.* (2004) and Simon *et al.* (2009).

The *Rhexia* clade as a whole deviates from this pattern of geographical integrity, but each genus is



geographically restricted. *Pachyloma*, a genus of four species, is restricted to north-western Amazonia, whereas *Arthrostemma*, also with four species, is found along the Andes, from Bolivia to Venezuela and northern Brazil, and in Central America, Mexico and the Antilles. This widespread distribution of *Arthrostemma* is attributable only to one species, *A. ciliatum* Pav. ex D. Don, which is a tetraploid ( $N = 30$ ), probably derived from *A. primaevum* Almeda, a diploid species ( $N = 15$ ) restricted to southern Mexico (Almeda & Chuang, 1992; Almeda, 1994). *Rhexia* is the only genus of Melastomataceae found in subtropical and temperate North America, with most species being distributed from Texas to Nova Scotia. One widespread species is also found in Cuba, Hispaniola and Puerto Rico (Kral & Bostick, 1969; Liogier, 2000; Ionta *et al.*, 2007). Even although these species are found in three different regions, all three genera are found in poorly drained, usually acidic soils. Fossil seeds from the early to mid-Miocene that have been collected throughout Eurasia (Dorofeev, 1960, 1963, 1988; Collinson & Pinggen, 1992; Dyjor *et al.*, 1992; Mai, 2000) closely match those of this clade with a cochleate shape and multicellular tubercles (Renner, Clausing & Meyer, 2001b; Renner & Meyer, 2001). This is especially relevant considering that these fossils have been used as calibration points in molecular dating and biogeographical studies (Renner *et al.*, 2001b; Renner & Meyer, 2001; Morley & Dick, 2003; Fritsch *et al.*, 2004; Renner, 2004a, b), and the fossil is found well outside the modern distribution of these three extant genera.

*Pterolepis* (with 14 species) and *Pterogastra* (with two species) grow almost exclusively in different types of grasslands in the Neotropics. Most species of *Pterolepis* are endemic to cerrado vegetation in central and eastern Brazil, with one widespread species reaching into the Caribbean and a second into Central America and Southern Mexico (Renner, 1994a). One *Pterogastra* sp. is only found in savannas in south-west Venezuela and Colombia, and a second is widespread on the eastern slopes of the Andes from sea level to 2600 m (Renner, 1994b).

The Palaeotropical Melastomeae clade includes species of open and forested areas. Sampling in this group is far from adequate to answer biogeographical questions with a high level of certainty, but, based on morphology, it is almost certain that all Palaeotropical Melastomeae do indeed fall into this group. This preliminary sampling shows that Madagascan and Asian lineages are derived from within Africa, and not from the Neotropics.

In the group formed by *Tibouchina* and allied genera, *Desmoscelis* and *Tibouchina* sections *Tibouchina* and *Barbigerae* are also found in open habitats in the savannas and the lower portion of the

Andean slopes of South America. *Heterocentron*, *Centradenia* and *Pilocosta* are mostly found on the edges of mid-elevation and cloud forest from north-western Colombia to Mexico (with one *Pilocosta* sp. extending into Ecuador), constituting a predominantly Mexican/Central American clade. The other group with tetramerous species, *Monochaetum* and allies, is mostly distributed at high elevation in paramos and cloud forests. *Castratella* and *Bucquetia* are restricted to paramos in western Venezuela and eastern Colombia. *Chaetolepis* is mostly found in South American paramos, with one species endemic to the highest elevations in Costa Rica and one species in the Guayana highlands. *Chaetolepis gentianoides* (Naudin) Jacq.-Fél., a species restricted to the sandstone highlands of western Africa, renders *Chaetolepis* the only genus in Melastomatoideae disjunct between the Neotropics and Paleotropics. Unfortunately, material of this species was not available for sequencing during the course of this study. A morphological cladistic analysis (Grimm, 2009) found that this species grouped with New World *Chaetolepis*, but most of the anther morphology in this group is highly reduced, and, because of the presence of intercalycine projections at the apex of the hypanthium, a placement in the Old World Melastomeae cannot be discounted. *Monochaetum* is the most species-rich genus in the clade with c. 30 species distributed in South America and 20 in Mexico and Central America. Most Central American species are found in cloud forests in Costa Rica and Panama, and a second, smaller group in the mountains of southern Mexico. Most South American species are found in the paramos and cloud forests of Venezuela and Colombia, with a few species extending as far south as central Peru and one widespread species in the Guayana Highlands (Almeda, 1978, 2009; Alvear, 2010).

All *Brachyotum* spp. are found at high elevations in the Andes from Colombia to Argentina (but not in Chile), either in paramo or puna vegetation, or in the surrounding cloud forests (Wurdack, 1953). The majority of the members of *Tibouchina* in this clade (*Tibouchina* sections *Diotanthera* and *Lepidotae*) are also found at high elevations in the Andes and mountains of southern Central America. A small group of species in this clade [see clade with *T. clinopodifolia* (DC.) Cogn.] is found in the forests of the Mata Atlantica, which may provide evidence of a dispersal event from the Andes to Eastern Brazil. This connection between the Andes and high elevation floras in eastern Brazil has been reported for other plant groups (e.g. Berry *et al.*, 2004; Perret, Chautems & Spichiger, 2006; Struwe *et al.*, 2009; Vasco, 2011). A connection through favourable habitats in southern Brazil during cool periods, rather than long distance dispersal, seems to be the most likely explanation for

this pattern (Safford, 2007). The distribution pattern of species in the *T. clinopodifolia* clade would also favour this hypothesis. One species, *T. longifolia* (Vahl) Baill., is widespread from Mexico and the Antilles to Bolivia, and a close relative *T. geitneriana* (Schltdl) Cogn. is also widely distributed, but usually found at slightly higher elevations.

*Tibouchina* sections *Pleroma*, *Diplostegia*, *Involucrales* and the remainder of sections *Diotanthera* and *Purpurella*, along with the genera *Itatiaia*, *Microlepis*, *Svitramia* and *Tibouchinopsis* are all found in eastern Brazil, mostly in Mata Atlantica vegetation, but some also grow on the exposed summits of rocky outcrops and campos rupestres, cerrados and coastal vegetation.

#### NICHE CONSERVATISM AND HABITAT SHIFTS

The strong geographical structuring found in the pedoconnective clade of Melastomataceae can be attributed to phylogenetic niche conservatism (Harvey & Pagel, 1991; Wiens, 2004; Donoghue, 2008), coupled with limited colonization of new environments and/or dispersal and with *in situ* speciation (Pennington, Richardson & Lavin, 2006; Pennington, Lavin & Oliveira, 2009; Schrire *et al.*, 2009; Pennington *et al.*, 2010). Not only are many groups restricted to the same geographical area, but the vast majority of the species are found in open habitats, regardless of soil, temperature or elevation. Thus, even in cases of habitat shift or colonization of new environments (e.g. with the uplift of the Andes or the appearance of the cerrado and Mata Atlantica biomes), this has occurred through habitats that share some characteristics that have allowed the incoming group to be successful. These types of habitat shifts to similar, but not identical environments have been shown to occur at higher phylogenetic levels and broader biome types for several plant groups (see review by Crisp *et al.*, 2009, and references therein).

Phylogenetic niche conservatism has also been invoked to explain the presence of closely related groups in disjunct areas with similar environmental conditions (Donoghue, 2008). Several plant groups in the high Andes seem to follow this pattern, but in many cases they have originated in temperate environments outside South America (von Hagen & Kadereit, 2001, 2003; Bell & Donoghue, 2005; Hughes & Eastwood, 2006; Fritsch *et al.*, 2008). A lowland, tropical origin for Andean groups, as shown here for some members of the pedoconnective clade of Melastomataceae, can also be inferred in tribe Miconieae (Michelangeli *et al.*, 2008), and recently has been shown for other groups of angiosperms (Antonelli *et al.*, 2009; Jabaily & Sytsma, 2011; Luebert, Hilger

& Weigend, 2011; Simon *et al.*, 2011). In the pedoconnective clade, this situation is seen in *Monochaetum* (found at high elevations in the northern Andes and mountains of Central America), *Chaetolepis* (paramos or northern South America, mountains in Costa Rica and summits of tepuis in the Guayana shield), and representatives of *Tibouchina* from the southern Andes and high elevations of the Mata Atlantica (see Fig. 2b clades Iiv and Iv).

When viewed as a whole, the pedoconnective clade is found in a wide variety of environments from sea level to 4000 m, in both tropical and subtropical climates (with some species of *Rhexia* and *Melastoma* extending through temperate climates). This distribution of taxa across such different environments may at first contradict our claim of phylogenetic niche conservatism in the group. However, it is important to note that habitat distribution is phylogenetically clustered, and the widespread distribution of our study group is only attributable to the broad phylogenetic scope of the study. Moreover, if we look at any two taxa in the same or closely related clades and with extremely different habitats (e.g. lowland savannas vs. mid-elevation cloud forests of Mata Atlantica in clade J), we can see how other closely related taxa of the second group are found in intermediate environments (i.e. open habitats at high elevations). Thus, the widespread Neotropical distribution of the pedoconnective clade could have been accomplished through successive colonization of neighbouring or similar environments (as described by Crisp *et al.*, 2009) and by 'niche crawling' from one environment to another, and the ultimate result would be a broad distribution. Unfortunately, the current level of phylogenetic resolution between clades F–J, and, in some of these clades, is insufficient to test this hypothesis. A more resolved phylogenetic tree will also help address questions about multiple colonizations of Central America (clades G and Ii and some members of clade H), the Andes (clades H and Iv) or the cerrado biome (Microlicieae and some members of clades C, D and J).

In summary, the pedoconnective clade of Melastomataceae appears to have radiated and speciated mostly through open habitats, with wind dispersal of seeds produced in capsular fruits playing an important role. Competition for pollinators (mostly bees), and pollen economy (through heteranthery), may have driven the evolution and diversification of stamen morphology in this group (Gross, 1993; Larson & Barrett, 1999; Luo & Zhang, 2005; Vallejo-Marin *et al.*, 2010). These hypotheses were already advanced by Renner & Meyer (2001) and would be in agreement with the predictions of the niche conservatism hypothesis and colonization of similar or

adjacent environments and are supported here with increased taxon and character sampling.

#### ACKNOWLEDGEMENTS

We thank wish to thank M. Alford, J. F. Baumgratz, I. Capote, R. Goldenberg, W. Judd, L. Kelly, L. Kollman, A. Lobao, C. V. Martin, H. Mendoza, R. Naczi, M. Nee, K. Redden, A. K dos Santos, K. Steiner and K. Wurdack for providing leaf and/or herbarium material. Antoine Nicolas provided invaluable help in the laboratory. This research was supported by a grant from CAPES, Brazil to P.J.F.G. (Scholarship Process Number BEX 2128/09-8). Partial support was also provided by the Cullman Program for Molecular Systematics and the structural botany laboratory at The New York Botanical Garden and grant DEB- 0818399 from NSF to F.A.M. R.K. was supported by the Oliver Hazard Perry Graduate Fellowship at The New York Botanical Garden and D.S.P. was partially supported by the John J. Rose Postdoctoral Fellowship at the California Academy of Sciences. Susanne Renner, an anonymous reviewer and Toby Pennington provided valuable comments that greatly improved this article.

#### REFERENCES

- Almeda F. 1977.** Systematics of the Neotropical genus *Centradenia* (Melastomataceae). *Journal of the Arnold Arboretum* **58**: 73–108.
- Almeda F. 1978.** Systematics of the genus *Monochaetum* (Melastomataceae) in Mexico and Central America. *University of California Publication in Botany* **75**: 1–134.
- Almeda F. 1993.** *Pilocosta* (Melastomataceae, revisited: a new species, polyploidy, and the base chromosome number of the genus. *Novon* **3**: 311–316.
- Almeda F. 1994.** *Arthrostemma primaevum* (Melastomataceae): a new species endemic to southeastern Mexico. *Brittonia* **46**: 75–80.
- Almeda F. 2009.** Melastomataceae. In: Davidse G, Sousa SM, Knapp S, Chiang F, eds. *Flora mesoamericana*. Mexico City: Universidad Nacional Autonoma de Mexico, 164–338.
- Almeda F, Chuang TI. 1992.** Chromosome numbers and their systematic significance in some Mexican Melastomataceae. *Systematic Botany* **17**: 583–593.
- Almeda F, Martins AB. 2001.** New combinations and new names in some Brazilian Microlicieae (Melastomataceae), with notes on the delimitation of *Lavoisiera*, *Microlicia*, and *Trembleya*. *Novon* **11**: 1–7.
- Almeda F, Robinson OR. 2011.** Systematics and Phylogeny of *Siphanthera* (Melastomataceae). *Systematic Botany Monographs* **93**: 1–101.
- Almeda F, Whiffin T. 1980.** *Pilocosta*, a new genus of tropical American Melastomataceae. *Systematic Botany* **5**: 294–311.
- Alvear DM. 2010.** *Systematics of the genus Monochaetum (Melastomataceae) in Colombia*. San Francisco, CA: San Francisco State University.
- Amorim AM, Goldenberg R, Michelangeli FA. 2009.** A new species of *Physeterostemon* (Melastomataceae) from Bahia, Brazil, with notes on the phylogeny of the genus. *Systematic Botany* **34**: 324–329.
- Antonelli A, Nylander JAA, Persson C, Sanmartin I. 2009.** Tracing the impact of the Andean uplift on Neotropical plant evolution. *Proceedings of the National Academy of Sciences of the United States of America* **106**: 9749–9754.
- Baumgratz JFA, Souza MLDR, Woodgyer EM, Nic Lughadha EM. 1996.** Polysporangiate anthers: described for the first time in Melastomataceae. *Kew Bulletin* **51**: 133–144.
- Bell CD, Donoghue MJ. 2005.** Phylogeny and biogeography of Valerianaceae (Dipsacales) with special reference to the South American valerians. *Organisms Diversity and Evolution* **5**: 147–159.
- Berry PE, Hahn WJ, Sytsma KJ, Hall JC, Mast A. 2004.** Phylogenetic relationships and biogeography of Fuchsia (Onagraceae) based on noncoding nuclear and chloroplast DNA data. *American Journal of Botany* **91**: 601–614.
- Brade AC. 1958.** Melastomatáceas novas da região amazônica. *Instituto Nacional de Pesquisas da Amazônia, Botanica* **8**: 1–18.
- Brade AC, Markgraf F. 1961.** Neue Melastomataceen aus Brasilien. *Willdenowia* **2**: 769–774.
- Candolle APD. 1828.** Mémoires sur la famille des Mélastomacées. *Prodromus Systematis Naturalis Regny Vegetabilis* **3**: 99–102.
- Clausing G, Meyer K, Renner SS. 2000.** Correlations among fruit traits and evolution of different fruit within the Melastomataceae. *Botanical Journal of the Linnean Society* **133**: 303–326.
- Clausing G, Renner SS. 2001.** Molecular phylogenetics of Melastomataceae and Memecylaceae: implications for character evolution. *American Journal of Botany* **88**: 486–498.
- Cogniaux CA. 1885.** Melastomataceae. *Flora Brasiliensis* **14**: 1–510.
- Cogniaux CA. 1891.** Melastomaceae. *Monographie Phanerogamarum* **7**: 1–1256.
- Collinson ME, Pinggen M. 1992.** Seeds of the Melastomataceae from the Miocene of central Europe. In: Kovar-Eder J, ed. *Palaeovegetational development in Europe*. Vienna: Museum of Natural History, 129–139.
- Crisp MD, Arroyo MTK, Cook LG, Gandolfo MA, Jordan GJ, McGlone MS, Weston PH, Westoby M, Wilf P, Linder HP. 2009.** Phylogenetic biome conservatism on a global scale. *Nature* **458**: 754–756.
- Donoghue MJ. 2008.** A phylogenetic perspective on the distribution of plant diversity. *Proceedings of the National Academy of Sciences of the United States of America* **105**: 11549–11555.
- Dorofeev PI. 1960.** On the Tertiary flora of Belorussia [in Russian]. *Botanicheskyy Zhurnal SSSR* **45**: 1418–1434.
- Dorofeev PI. 1963.** *The Tertiary floras of western Siberia*. Moskva-Leningrad: Izdatelstvo Akademii Nauk SSSR.



- Dorofeev PI.** 1988. *Miocene floras of the Tambov district*. Leningrad: Akademii Nauk.
- Dyjoy S, Kvacek Z, Lanucka-Srodoniowa M, Pyszynski W, Sadowska A, Zsawniak E.** 1992. The younger Tertiary deposits in the Gozdnica region (SW Poland) in the light of recent palaeobotanical research. *Polish Botanical Studies* **3**: 1–129.
- Freire-Fierro A.** 2002. Monograph of *Aciotis* (Melastomataceae). *Systematic Botany Monographs* **62**: 1–129.
- Fritsch PW, Almeda F, Renner SS, Martins AB, Cruz BC.** 2004. Phylogeny and circumscription of the near-endemic Brazilian tribe Microlicieae (Melastomataceae). *American Journal of Botany* **91**: 1105–1114.
- Fritsch PW, Kelly LM, Wang Y, Almeda F, Kriebel R.** 2008. Revised infrafamilial classification of Symplocaceae based on phylogenetic data from DNA sequences and morphology. *Taxon* **57**: 823–852.
- Gleason HA.** 1929. The genus *Monochaetum* in South America. *American Journal of Botany* **16**: 502–522.
- Goldenberg R, Penneys DS, Almeda F, Judd WS, Michelangeli FA.** 2008. Phylogeny of *Miconia* (Melastomataceae): patterns of stamen diversification in a megadiverse neotropical genus. *International Journal of Plant Sciences* **169**: 963–979.
- Goloboff P.** 1993. Nona. 1.6 edn. Tucuman, Argentina: Software and documentation by the author.
- Goloboff PA, Farris JS, Nixon KC.** 2008. TNT, a free program for phylogenetic analysis. *Cladistics* **24**: 774–786.
- Grimm DT.** 2009. *Systematics of genus Chaetolepis (Melastomataceae): a morphological cladistic analysis, biogeographical investigation, and taxonomic revision*. San Francisco, CA: San Francisco State University.
- Gross CL.** 1993. The breeding system and pollinators of *Melastoma affine* (Melastomataceae); a pioneer shrub in tropical Australia. *Biotropica* **25**: 468–474.
- Guimaraes PJF, Martins AB.** 1997. *Tibouchina* sect. *Pleroma* (D. Don) Cogn. (Melastomataceae) in Sao Paulo state. *Revista Brasileira de Botanica* **20**: 11–33.
- von Hagen KB, Kadereit JW.** 2001. The phylogeny of Gentianella (Gentianaceae) and its colonization of the southern hemisphere as revealed by nuclear and chloroplast DNA sequence variation. *Organisms Diversity and Evolution* **1**: 61–79.
- von Hagen KB, Kadereit JW.** 2003. The diversification of Halenia (Gentianaceae): ecological opportunity versus key innovation. *Evolution* **57**: 2507–2518.
- Hall T.** 2007. *Bioedit biological sequence alignment editor, version 7.0.9*. Carlsbad, CA: Ibis Biosciences.
- Hansen C.** 1977. The Asiatic species of *Osbeckia*. *Ginkgoana* **4**: 1–150.
- Hansen C.** 1992. The genus *Phyllagathis* (Melastomataceae): characteristics; delimitation; the species in Indo-China and China. *Bulletin du Muséum National d'Histoire Naturelle Section B Adansonia Botanique Phytochimie* **14**: 355–428.
- Harvey PH, Pagel MD.** 1991. *The comparative method in evolutionary biology*. Oxford: Oxford University Press.
- von Helversen O, Winter Y.** 2003. Glossophagine bats and their flowers: costs and benefits for plants and pollinators. In: Kunz TH, Fenton MB, eds. *Bat ecology*. Chicago, IL: The University of Chicago Press, 346–397.
- Hughes C, Eastwood R.** 2006. Island radiation on a continental scale: exceptional rates of plant diversification after uplift of the Andes. *Proceedings of the National Academy of Sciences of the United States of America* **103**: 10334–10339.
- Ionta GM, Judd WS, Williams NH, Whitten WM.** 2007. Phylogenetic relationships in *Rhexia* (Melastomataceae): evidence from DNA sequence data and morphology. *International Journal of Plant Sciences* **168**: 1055–1066.
- Jabaily RS, Sytsma KJ.** 2011. Phylogenetics of *Puya* (Bromeliaceae): placement, major lineages, and evolution of Chilean species. *American Journal of Botany* **97**: 337–356.
- Jacques-Félix H.** 1994. Histoire des Melastomataceae d'Afrique. *Bulletin du Muséum National d'Histoire Naturelle Section B, Adansonia, 4e sér.* **16**: 235–311.
- Koschnitzke C, Martins AB.** 1999. New combinations and a new species in the Brazilian genus *Chaetostoma* DC. (Microlicieae: Melastomataceae). *Novon* **9**: 202–204.
- Koschnitzke C, Martins AB.** 2006. Revisao taxonomica de *Chaetostoma* DC. (Melastomataceae, Microlicieae). *Arquivos do Museu Nacional, Rio de Janeiro* **64**: 95–119.
- Kral R, Bostick PE.** 1969. The genus *Rhexia* (Melastomataceae). *Sida* **3**: 387–440.
- Kriebel R.** 2012. Synopsis of the genus *Poteranthera* Bong. (Melastomeae: Melastomataceae) with the description of a new, apparently pollinator deceiving species. *Brittonia* **64**: 6–14.
- Larson BMH, Barrett SCH.** 1999. The pollination ecology of buzz-pollinated *Rhexia virginica* (Melastomataceae). *American Journal of Botany* **86**: 502–511.
- Liogier HA.** 2000. *Melastomataceae. Flora de la Española*. Santo Domingo: Jardín Botánico Nacional Dr. Rafael Ma. Moscoso & Instituto Tecnológico de Santo Domingo.
- Little D.** 2006. 2xRead (a simple gap coding script). Software and documentation by the author. New York.
- Luebert F, Hilger HH, Weigend M.** 2011. Diversification in the Andes: age and origins of South American *Heliotropium* lineages (Heliotropiaceae, Boraginales). *Molecular Phylogenetics and Evolution* **61**: 90–102.
- Luo Z, Zhang D.** 2005. A review of heteranthery in flowering plants. *Journal of Tropical and Subtropical Botany* **13**: 536–542.
- Mai DH.** 2000. Die untermiozänen Floren aus der Spremberger Folge und dem II. Flözhorizont der Lausitz. Teil III. Dialypetalae und Sympetalae. *Palaeontographica Abteilung B* **253**: 1.
- Martin CV, Little DP, Goldenberg R, Michelangeli F.** 2008. A phylogenetic evaluation of *Leandra* (Miconieae, Melastomataceae): a polyphyletic genus where the seeds tell the story, not the petals. *Cladistics* **24**: 315–327.
- Meyer K.** 2001. Revision of the Southeast Asian genus *Melastoma* (Melastomataceae). *Blumea* **46**: 351–398.
- Michelangeli FA, Judd WS, Penneys DS, Skean JD, Becquer-Granados ER, Goldenberg R, Martin CV.**

2008. Multiple events of dispersal and radiation of the tribe Miconieae (Melastomataceae) in the Caribbean. *Botanical Review* **74**: 53–77.
- Michelangeli FA, Penneys DS, Giza J, Soltis D, Hils MH, Skean JD Jr. 2004.** A preliminary phylogeny of the tribe Miconieae (Melastomataceae) based on nrITS sequence data and its implications on inflorescence position. *Taxon* **53**: 279–290.
- Miller MA, Pfeiffer W, Schwartz T. 2010.** Creating the CIPRES Science Gateway for inference of large phylogenetic trees. *Proceedings of the Gateway Computing Environments Workshop (GCE)*. New Orleans, LA.
- Morley RJ, Dick CW. 2003.** Missing fossils, molecular clocks, and the origin of the Melastomataceae. *American Journal of Botany* **90**: 1638–1644.
- Naudin CV. 1849–1853.** Melastomacearum monographicae descriptiones. *Annales des Sciences Naturelles; Botanique. Series III*. Consolidated reprint, 1–719.
- Nixon KC. 1999.** The Parsimony Ratchet, a new method for rapid parsimony analysis. *Cladistics* **15**: 407–414.
- Nixon KC. 1999–2002.** WinClada. Software and Documentation by the author. 0.6.7c Beta ed. Ithaca, NY.
- Penneys DS, Judd WS. 2005.** A systematic revision and cladistic analysis of *Chorizanthe* (Melastomataceae) using morphological and molecular characters. *Systematic Botany* **30**: 559–584.
- Penneys DS, Judd WS. 2011.** Phylogenetics and morphology in the Blakeeae (Melastomataceae). *International Journal of Plant Sciences* **172**: 78–106.
- Penneys DS, Michelangeli FA, Judd WS, Almeda F. 2010.** Henrietteae: a new Neotropical tribe of berry-fruited Melastomataceae. *Systematic Botany* **35**: 783–800.
- Pennington RT, Lavin M, Oliveira A. 2009.** Woody plant diversity, evolution, and ecology in the tropics: perspectives from seasonally dry tropical forests. *Annual Review of Ecology Evolution and Systematics* **40**: 437–457.
- Pennington RT, Lavin M, Sarkinen T, Lewis GP, Klitgaard BB, Hughes CE. 2010.** Contrasting plant diversification histories within the Andean biodiversity hotspot. *Proceedings of the National Academy of Sciences of the United States of America* **107**: 13783–13787.
- Pennington RT, Richardson JE, Lavin M. 2006.** Insights into the historical construction of species-rich biomes from dated plant phylogenies, neutral ecological theory and phylogenetic community structure. *New Phytologist* **172**: 605–616.
- Perret M, Chautems A, Spichiger R. 2006.** Dispersal–vicariance analyses in the tribe Sinningieae (Gesneriaceae): a clue to understanding biogeographical history of the Brazilian Atlantic forest. *Annals of the Missouri Botanical Garden* **93**: 340–358.
- Perrier de la Bâthie H. 1934.** *Catalogue des plantes de Madagascar: Melastomaceae*. Tananarive: G. Pitot.
- Perrier de la Bâthie H. 1951.** *Mélastomatacées. Flore de Madagascar et des Comores*. Paris: Fermin-Didot.
- Reginato M, Michelangeli FA, Goldenberg R. 2010.** Phylogeny of *Pleiochiton* (Melastomataceae, Miconieae): total evidence. *Botanical Journal of the Linnean Society* **162**: 423–434.
- Renner SS. 1989.** Systematic studies in the Melastomataceae *Bellucia*, *Loreya* and *Macairea*. *Memoirs of the New York Botanical Garden* **50**: 1–112.
- Renner SS. 1993.** Phylogeny and classification of the Melastomataceae and Memecylaceae. *Nordic Journal of Botany* **13**: 519–540.
- Renner SS. 1994a.** A revision of *Pterolepis* (Melastomataceae: Melastomeae). *Nordic Journal of Botany* **14**: 73–104.
- Renner SS. 1994b.** Revisions of *Pterogastra* and *Schwackaea* (Melastomataceae: Melastomeae). *Nordic Journal of Botany* **14**: 65–71.
- Renner SS. 2004a.** Bayesian analysis of combined chloroplast loci, using multiple calibrations, supports the recent arrival of Melastomataceae in Africa and Madagascar. *American Journal of Botany* **91**: 1427–1435.
- Renner SS. 2004b.** Multiple Miocene Melastomataceae dispersal between Madagascar, Africa and India. *Philosophical Transactions of the Royal Society of London Series B–Biological Sciences* **359**: 1485–1494.
- Renner SS, Clausing G, Cellinese N, Meyer K. 2001a.** Melastomataceae. In: Larsen K, Nielsen I, eds. *Flora of Thailand 7, 3*. Bangkok: The Forest Herbarium, Royal Forest Dept, 412–496.
- Renner SS, Clausing G, Meyer K. 2001b.** Historical biogeography of Melastomataceae: the roles of Tertiary migration and long-distance dispersal. *American Journal of Botany* **88**: 1290–1300.
- Renner SS, Meyer K. 2001.** Melastomeae come full circle: biogeographic reconstruction and molecular clock dating. *Evolution* **55**: 1315–1324.
- Romero R, Martins AB. 2003.** Four new species of *Svitramia* Cham. (Melastomataceae, Melastomeae) from Minas Gerais, Brazil. *Kew Bulletin* **58**: 403–413.
- Safford HD. 2007.** Brazilian paramos IV. Phytogeography of the campos de altitude. *Journal of Biogeography* **34**: 1701–1722.
- Schrire BD, Lavin M, Barker NP, Forest F. 2009.** Phylogeny of the tribe indigofereae (Leguminosae–Papilionoideae): geographically structured more in succulent-rich and temperate settings than in grass-rich environments. *American Journal of Botany* **96**: 816–852.
- Shaw J, Lickey EB, Beck JT, Farmer SB, Liu W, Miller J, Siripun KC, Winder CT, Schilling EE, Small RL. 2005.** The tortoise and the hare II: relative utility of 21 noncoding chloroplast DNA sequences for phylogenetic analysis. *American Journal of Botany* **92**: 142–166.
- Simmons MP, Ochoterena H. 2000.** Gaps as characters in sequence-based phylogenetic analyses. *Systematic Biology* **49**: 369–381.
- Simon MF, Grether R, de Queiroz LP, Saerkinen TE, Dutra VF, Hughes CE. 2011.** The evolutionary history of *Mimosa* (Leguminosae): toward a phylogeny of the sensitive plants. *American Journal of Botany* **98**: 1201–1221.
- Simon MF, Grether R, de Queiroz LP, Skema C, Pennington RT, Hughes CE. 2009.** Recent assembly of

- the Cerrado, a Neotropical plant diversity hotspot, by *in situ* evolution of adaptations to fire. *Proceedings of the National Academy of Sciences of the United States of America* **106**: 20359–20364.
- Solt ML, Wurdack JJ. 1980.** Chromosome numbers in the Melastomataceae. *Phytologia* **47**: 199–220.
- Stamatakis A. 2006.** RAxML-VI-HPC: maximum likelihood-based phylogenetic analyses with thousands of taxa and mixed models. *Bioinformatics* **22**: 2688–2690.
- Stamatakis A, Hoover P, Rougemont J. 2008.** A rapid bootstrap algorithm for the RAxML web servers. *Systematic Biology* **57**: 758–771.
- Stiles FG, Ayala AV, Giron M. 1992.** Pollination of the flowers of *Brachyotum* (Melastomataceae) by two species of *Diglossa* (Emberizidae). *Caldasia* **17**: 47–54.
- Struwe L, Haag S, Heiberg E, Grant JR. 2009.** Andean speciation and vicariance in neotropical Macrocarpaea (Gentianaceae–Helieae). *Annals of the Missouri Botanical Garden* **96**: 450–469.
- Thiers B. 2012** (continuously updated). *Index Herbariorum: A global directory of public herbaria and associate staff*. New York: The New York Botanical Garden. <http://sweetgum.nybg.org/ih>
- Thompson JD, Gibson TJ, Plewniak F, Jeanmougin F, Higgins DG. 1997.** The Clustal X windows interface: flexible strategies for multiple sequence alignment aided by quality analysis tools. *Nucleic Acids Research* **25**: 4876–4882.
- Todzia CA. 1999.** Ten new species of *Tibouchina* (Melastomataceae) from Mexico. *Brittonia* **51**: 255–279.
- Todzia CA, Almeda F. 1991.** A revision of *Tibouchina* section *Lepidotae* (Melastomataceae: Tibouchineae). *Proceedings of the California Academy of Sciences* **47**: 175–206.
- Triana J. 1871.** Les Melastomacées. *Transactions of the Linnean Society of London* **28**: 1–188.
- Ule EHG. 1908.** Beiträge zur Flora von Bahia. I. *Botanische Jahrbücher für Systematik* **42**: 191–238.
- Vallejo-Marin M, Da Silva EM, Sargent RD, Barrett SCH. 2010.** Trait correlates and functional significance of heteranthery in flowering plants. *New Phytologist* **188**: 418–425.
- Vasco A. 2011.** Taxonomic revision of *Elaphoglossum* subsection *Muscosa* (Dryopteridaceae). *Blumea* **56**: 165–202.
- van Vliet G, Koek-Noorman J, Ter Welle BJH. 1981.** Wood anatomy, classification and phylogeny of the Melastomataceae. *Blumea* **27**: 463–473.
- Vogel S. 1958.** Fledermausblumen in Sudamerika. *Österreichische Botanische Zeitschrift* **104**: 491–530.
- Vogel S. 1997.** Remarkable nectaries: structure, ecology, organophyletic perspectives. 1. Substitutive nectaries. *Flora* **192**: 305–333.
- Whiffin T, Tomb AS. 1972.** The systematic significance of seed morphology in the Neotropical capsular fruited Melastomataceae. *American Journal of Botany* **59**: 411–422.
- Whiffin TP. 1972.** *A systematic study of the genus Heterocentron (Melastomataceae)*. Austin: University of Texas.
- Whiffin TP. 1990.** *Melastomataceae*. In: Robe R, ed. *Flora of Australia*. Canberra: Australian Government Publishing Service, 243–255.
- Wickens GE. 1974.** Notes on Melastomataceae for the ‘Flora of tropical East Africa’. *Kew Bulletin* **29**: 141–153.
- Wiens JJ. 2004.** Speciation and ecology revisited: phylogenetic niche conservatism and the origin of species. *Evolution* **58**: 193–197.
- Wilson CL. 1950.** Vasculature of the stamen in the Melastomataceae, with some phyletic implications. *American Journal of Botany* **37**: 431–444.
- Wurdack JJ. 1953.** A revision of the genus *Brachyotum* (Tibouchineae–Melastomataceae). *Memoirs of the New York Botanical Garden* **8**: 343–407.
- Wurdack JJ. 1964.** Melastomataceae. In: Maguire B, Wurdack JJ, Collaborators, eds. *Botany of the Guayana Highlands-part V. Memoirs of the New York Botanical Garden* **10**: 135–186.
- Wurdack JJ. 1967.** Certamen Melastomataceae XI. *Phytologia* **14**: 257–274.
- Wurdack JJ. 1986.** Atlas of hairs for Neotropical Melastomataceae. *Smithsonian Contributions to Botany* **63**: 1–80.



## APPENDIX

List of species, voucher information, provenance and GenBank accession data included in this study [nuclear ribosomal internal transcribed spacer (nrITS), *accD-psaI*, *psbK-psbL*]. Voucher information only provided for species newly sequenced for this study; all others taken from GenBank. Additional vouchers may be deposited at other herbaria (acronyms following Thiers, 2012).

| Species                                                         | Collector, number<br>(herbarium) | Provenance    | nrITS    | <i>accD-psaI</i> | <i>psbK-psbL</i> |
|-----------------------------------------------------------------|----------------------------------|---------------|----------|------------------|------------------|
| <i>Acanthella sprucei</i> Hook.f.                               | Diaz, W., 4538 (NY)              | Brazil        | JQ730036 | JQ730247         | JQ730456         |
| <i>Aciotis acuminifolia</i> (Mart. ex DC.)<br>Triana            | Martin, C. V., 487 (NY)          | French Guiana | JQ730037 | JQ730248         | JQ730457         |
| <i>Aciotis circaeifolia</i> (Bonpl.) Triana                     | Caddah, M.K., 621 (NY)           | Brazil        | JQ730038 | JQ730249         | JQ730458         |
| <i>Aciotis indecora</i> (Bonpl.) Triana                         | Martin, C. V., 411 (NY)          | French Guiana | JQ730039 | JQ730250         | JQ730459         |
| <i>Aciotis paludosa</i> (Mart. ex DC.)<br>Triana                | Guimarães, P., 317 (RB)          | Brazil        | JQ730040 | JQ730251         | JQ730460         |
| <i>Aciotis purpurascens</i> (Aubl.) Triana                      | Martin, C. V., 422 (NY)          | French Guiana | JQ730041 | JQ730252         | JQ730461         |
| <i>Aciotis rubricaulis</i> (Mart. ex DC.)<br>Triana             | Goldenberg, R., 850 (NY)         | Brazil        | JQ730042 | JQ730253         | JQ730462         |
| <i>Acisanthera alsinaefolia</i> (DC.) Triana                    | Goldenberg, R., 826 (NY)         | Brazil        | JQ730043 | JQ730254         | JQ730463         |
| <i>Acisanthera hedyotidea</i> (C.Presl.)<br>Triana              | Wurdack, K. J., 4145 (NY)        | Guyana        | JQ730044 | JQ730255         | JQ730464         |
| <i>Acisanthera quadrata</i> Pers.                               | Michelangeli, F. A., 826 (BH)    | Venezuela     | JQ730045 | JQ730256         | JQ730465         |
| <i>Amphorocalyx multiflorus</i> Baker                           | Almeda, F., 8669 (CAS)           | Madagascar    | JQ730046 | JQ730257         | JQ730466         |
| <i>Amphorocalyx rupestris</i> H.Perrier                         | Almeda, F., 8723 (CAS)           | Madagascar    | JQ730047 | JQ730258         | JQ730467         |
| <i>Antherotoma naudinii</i> Hook.f.                             | Almeda, F., 8624 (CAS)           | Madagascar    | JQ730048 | JQ730259         | –                |
| <i>Appendicularia thymifolia</i> (Bonpl.)<br>Triana             | Martin, C. V., 441 (NY)          | French Guiana | JQ730049 | JQ730260         | JQ730468         |
| <i>Arthrostemma ciliatum</i> 1 Pav. ex<br>D.Don                 |                                  |               | DQ985619 | –                | –                |
| <i>Arthrostemma ciliatum</i> 2 Pav. ex<br>D.Don                 |                                  |               | AY460429 | –                | –                |
| <i>Arthrostemma primaevum</i> Almeda                            | Penneys, D. S., 1429 (FLAS)      | Mexico        | JQ730050 | JQ730261         | JQ730469         |
| <i>Brachyotum benthamianum</i> Triana                           | Alford, M., 3083 (BH)            | Ecuador       | JQ730051 | JQ730262         | JQ730470         |
| <i>Brachyotum confertum</i> (Bonpl.)<br>Triana                  | Penneys, D. S., 1603 (FLAS)      | Ecuador       | JQ730052 | JQ730263         | JQ730471         |
| <i>Brachyotum fictum</i> Wurdack                                | Penneys, D. S., 1594 (FLAS)      | Ecuador       | JQ730053 | JQ730264         | JQ730472         |
| <i>Brachyotum fraternum</i> Wurdack                             | Penneys, D. S., 1604 (FLAS)      | Ecuador       | JQ730054 | JQ730265         | JQ730473         |
| <i>Brachyotum harlingii</i> Wurdack                             | Penneys, D. S., 1593 (FLAS)      | Ecuador       | JQ730055 | JQ730266         | JQ730474         |
| <i>Brachyotum incrassatum</i> E.Cotton                          | Clark, J. L., 8896 (NY)          | Ecuador       | JQ730056 | JQ730267         | JQ730475         |
| <i>Brachyotum ledifolium</i> (Desr.) Triana                     | Penneys, D. S., 1554 (FLAS)      | Ecuador       | JQ730057 | JQ730268         | JQ730476         |
| <i>Brachyotum lindenii</i> Cogn.                                | Penneys, D. S., 1555 (FLAS)      | Ecuador       | JQ730058 | JQ730269         | JQ730477         |
| <i>Brachyotum microdon</i> (Naudin)<br>Triana                   | Nee, M., 55327 (NY)              | Bolivia       | JQ730059 | JQ730270         | JQ730478         |
| <i>Brachyotum rostratum</i> (Naudin)<br>Triana                  | Penneys, D. S., 1586 (FLAS)      | Ecuador       | JQ730060 | JQ730271         | JQ730479         |
| <i>Bucquetia glutinosa</i> (L.f.) DC.                           | Alvear, M., 1398 (CAS)           | Colombia      | JQ730061 | JQ730272         | JQ730480         |
| <i>Cambessedesia espora</i> (A.St.Hil. ex<br>Bonpl.) DC.        | Guimarães, P., 397 (RB)          | Brazil        | JQ730062 | JQ730273         | JQ730481         |
| <i>Cambessedesia hilariana</i> (A.St.Hil. ex<br>Bonpl.) DC.     | Guimarães, P., 405 (RB)          | Brazil        | JQ730063 | JQ730274         | JQ730482         |
| <i>Castratella piloseloides</i> (Bonpl.)<br>Naudin              | Gonzalez, F., 3830 (COL)         | Colombia      | JQ730064 | JQ730275         | JQ730483         |
| <i>Centradenia grandifolia</i> (Schltdl.)<br>Endl. ex Walp.     | Penneys, D. S., 1544 (FLAS)      | Costa Rica    | JQ730065 | JQ730276         | –                |
| <i>Centradenia inaequilateralis</i> (Schltdl.<br>& Cham.) G.Don | Michelangeli, F. A., 838-a (NY)  | Costa Rica    | JQ730066 | JQ730277         | JQ730484         |
| <i>Chaetolepis cufodontisii</i> Standl.                         | Michelangeli, F. A., 1160 (NY)   | Costa Rica    | JQ730067 | JQ730278         | JQ730485         |
| <i>Chaetolepis microphylla</i> (Bonpl.) Miq.                    | Michelangeli, F. A., 1268 (NY)   | Brazil        | JQ730068 | JQ730279         | JQ730486         |
| <i>Chaetostoma armatum</i> (Spreng.)<br>Cogn.                   | Guimarães, P., 396 (RB)          | Brazil        | JQ730069 | JQ730280         | JQ730487         |

APPENDIX *Continued*

| Species                                                                    | Collector, number<br>(herbarium) | Provenance            | nrITS    | <i>accd-psaI</i> | <i>psbK-psbL</i> |
|----------------------------------------------------------------------------|----------------------------------|-----------------------|----------|------------------|------------------|
| <i>Comolia microphylla</i> Benth.                                          | Redden, K. M., 1454 (NY)         | Guyana                | JQ730070 | JQ730281         | JQ730488         |
| <i>Comolia sertularia</i> (DC.) Triana                                     | Almeda, F., 7724 (CAS)           | Brazil                | JQ730071 | JQ730282         | JQ730489         |
| <i>Comolia vernicosa</i> (Benth.) Triana                                   | Wurdack, K. J., 4181 (NY)        | Guyana                | JQ730072 | JQ730283         | JQ730490         |
| <i>Desmocelis villosa</i> (Aubl.) Naudin                                   | Michelangeli, F. A., 827 (BH)    | Venezuela             | JQ730073 | JQ730284         | JQ730491         |
| <i>Dichaetanthera africana</i> Jacq.-Fél.                                  | Smith, S., 1885 (US)             | Gabon                 | JQ730074 | JQ730285         | JQ730492         |
| <i>Dichaetanthera oblongifolia</i> Baker                                   | Almeda, F., 7926a (CAS)          | Madagascar            | JQ730075 | JQ730286         | JQ730493         |
| <i>Dionycha bojeri</i> Naudin                                              | Almeda, F., 8626 (CAS)           | Madagascar            | JQ730076 | JQ730287         | JQ730494         |
| <i>Dissotis</i> cf. <i>phaeotricha</i> Harv.                               | Steiner, K., 3561 (NBG)          | Madagascar            | JQ730078 | JQ730289         | JQ730496         |
| <i>Dissotis multiflora</i> (Sm.) Triana                                    | Smith, S., 1886 (US)             | Gabon                 | JQ730077 | JQ730288         | JQ730495         |
| <i>Eriocnema fulva</i> Naudin                                              | Almeda, F., 8414 (CAS)           | Brazil                | EF418811 | JQ730291         | JQ730497         |
| <i>Ernestia confertiflora</i> Wurdack                                      | Penneys, D. S., 1913 (FLAS)      | French Guiana         | JQ730079 | JQ730292         | JQ730498         |
| <i>Ernestia glandulosa</i> Gleason                                         | Martin, C. V., 471 (NY)          | French Guiana         | JQ730080 | JQ730293         | JQ730499         |
| <i>Ernestia pullei</i> Gleason                                             | Martin, C. V., 460 (NY)          | French Guiana         | JQ730081 | JQ730294         | JQ730500         |
| <i>Ernestia tenella</i> (Bonpl.) DC.                                       | Michelangeli, F. A., 386 (BH)    | Venezuela             | JQ730082 | JQ730295         | JQ730501         |
| <i>Fritzchia erecta</i> Cham.                                              | Guimarães, P., 406 (RB)          | Brazil                | JQ730083 | JQ730296         | JQ730502         |
| <i>Graffenrieda latifolia</i> (Naudin)<br>Triana                           | Michelangeli, F. A., 794 (BH)    | Venezuela             | AY460450 | JQ730297         | JQ730503         |
| <i>Graffenrieda moritziana</i> Triana                                      | Michelangeli, F. A., 832 (BH)    | Venezuela             | AY460451 | JQ730298         | JQ730504         |
| <i>Guyonia ciliata</i> Hook.f.                                             | Mambo, P., 248 (NY)              | Cameroon              | JQ730084 | –                | JQ730505         |
| <i>Heterocentron elegans</i> (Schltdl.)<br>Kuntze                          | Cultivated NY, (NY)              | USA*                  | JQ730085 | JQ730299         | JQ730506         |
| <i>Heterocentron muricatum</i> Gleason                                     | Penneys, D. S., 1949 (FLAS)      | USA*                  | JQ730086 | JQ730300         | JQ730507         |
| <i>Heterocentron subtriplinerium</i> (Link<br>& Otto) A.Braun & C.D.Bouché | Penneys, D. S., 1430 (FLAS)      | Mexico                | JQ730087 | JQ730301         | JQ730508         |
| <i>Heterotis decumbens</i> (P.Beauv.) Trian                                | Smith, S., 1705 (US)             | Gabon                 | JQ730088 | JQ730302         | JQ730509         |
| <i>Heterotis rotundifolia</i> (Sm.) Jacq.-Fél.                             | Penneys, D. S., 1304 (FLAS)      | Dominica*             | JQ730089 | JQ730290         | –                |
| <i>Itatiaia cleistopetala</i> Ule                                          | Baumgratz, J. F. A., 1138b (R)   | Brazil                | JQ730090 | JQ730303         | JQ730510         |
| <i>Lavoisiera imbricata</i> (Thunb.) DC.                                   | Goldenberg, R., 820 (NY)         | Brazil                | JQ730091 | JQ730304         | JQ730511         |
| <i>Lavoisiera mucrifera</i> Mart. ex<br>Schrank ex DC.                     | Guimarães, P., 345 (RB)          | Brazil                | JQ730092 | JQ730305         | JQ730512         |
| <i>Lavoisiera pulchella</i> Cham.                                          | Goldenberg, R., 814 (NY)         | Brazil                | JQ730093 | JQ730306         | JQ730513         |
| <i>Macairea pachyphylla</i> Benth.                                         | Redden, K. M., 3869 (NY)         | Guyana                | JQ730094 | –                | –                |
| <i>Macairea radula</i> (Bonpl.) DC.                                        | Lima, J., 715 (UPCB)             | Brazil                | JQ730095 | JQ730307         | JQ730514         |
| <i>Macairea thyrsoflora</i> DC.                                            | Wurdack, K. J., 4153 (NY)        | Guyana                | JQ730096 | JQ730308         | JQ730515         |
| <i>Marcetia acerosa</i> DC.                                                | Santos, A. K. A., 681 (UFB)      | Brazil                | JQ730097 | –                | JQ730516         |
| <i>Marcetia eimeriana</i> A.B.Martins &<br>E.M.Woodgyer                    | Santos, A. K. A., 832 (UFB)      | Brazil                | JQ730098 | JQ730309         | JQ730517         |
| <i>Marcetia ericoides</i> Cogn.                                            | Santos, A. K. A., 532 (UFB)      | Brazil                | JQ730099 | JQ730310         | JQ730518         |
| <i>Marcetia harleyii</i> Wurdack                                           | Santos, A. K. A., 558 (UFB)      | Brazil                | JQ730100 | –                | JQ730519         |
| <i>Marcetia latifolia</i> Naudin                                           | Santos, A. K. A., 366 (UFB)      | Brazil                | JQ730101 | –                | JQ730520         |
| <i>Marcetia taxifolia</i> (A.St.Hil.) DC.                                  | Michelangeli, F. A., 680 (BH)    | Venezuela             | JQ730102 | JQ730311         | JQ730521         |
| <i>Melastoma affine</i> D.Don                                              |                                  |                       | GQ265878 | –                | –                |
| <i>Melastoma candidum</i> D.Don                                            | Chen, C. H., 6443 (TAIE)         | Taiwan                | JQ730103 | JQ730312         | JQ730522         |
| <i>Melastoma denticulatum</i> Labill.                                      | Simmons, M. P., 1842 (BH)        | New<br>Caledonia      | JQ730104 | JQ730313         | JQ730523         |
| <i>Melastoma dodecandrum</i> Desr.                                         |                                  |                       | GQ265883 | –                | –                |
| <i>Melastoma intermedium</i> Dunn                                          |                                  |                       | GQ265879 | –                | –                |
| <i>Melastoma malabathricum</i> L.                                          | Penneys, D. S., 1998 (CAS)       | China                 | JQ730105 | JQ730314         | JQ730524         |
| <i>Melastoma sanguineum</i> Sims                                           | Penneys, D. S., 2000 (CAS)       | China                 | JQ730106 | JQ730315         | JQ730525         |
| <i>Meriania longifolia</i> (Naudin) Cogn.                                  | Michelangeli, F. A., 610 (BH)    | Venezuela             | AY460454 | JQ730316         | JQ730526         |
| <i>Miconia dodecandra</i> (Desr.) Cogn.                                    | Judd, W. S., 8093 (FLAS)         | Dominican<br>Republic | AY460506 | JQ730317         | JQ730527         |
| <i>Miconia tomentosa</i> (Rich.) D.Don ex<br>DC.                           | Michelangeli, F. A., 1344 (NY)   | Brazil                | EF418905 | JQ730318         | JQ730528         |
| <i>Microlepis oleaefolia</i> (DC.) Triana                                  | Goldenberg, R., 1036 (NY)        | Brazil                | JQ730107 | JQ730319         | JQ730529         |
| <i>Monochaetum bonplandii</i> (Kunth.)<br>Naudin                           | Michelangeli, F. A., 1239 (NY)   | Venezuela             | JQ730108 | JQ730320         | JQ730530         |

APPENDIX *Continued*

| Species                                                         | Collector, number<br>(herbarium) | Provenance    | nrITS    | <i>accd-psaI</i> | <i>psbK-psbL</i> |
|-----------------------------------------------------------------|----------------------------------|---------------|----------|------------------|------------------|
| <i>Monochaetum discolor</i> H. Karst. ex Triana                 | Capote I., 811 (NY)              | Venezuela     | JQ730109 | JQ730321         | JQ730531         |
| <i>Monochaetum humboldtianum</i> (Kunth & Boché) Kunth ex Walp. | Michelangeli, F. A., 796 (BH)    | Venezuela     | JQ730110 | JQ730322         | JQ730532         |
| <i>Monochaetum meridense</i> (Klotzsch ex H.Karst.) Naudin      | Capote I., 862 (NY)              | Venezuela     | JQ730111 | JQ730323         | JQ730533         |
| <i>Monochaetum polyneuron</i> Triana                            | Michelangeli, F. A., 1267 (NY)   | Venezuela     | JQ730112 | JQ730324         | JQ730534         |
| <i>Monochaetum tenellum</i> Naudin                              |                                  |               | AY460432 | –                | –                |
| <i>Monochaetum uribe</i> Wurdack                                | Mendoza, H., 17593 (FMB)         | Colombia      | JQ730113 | JQ730325         | JQ730535         |
| <i>Monochaetum volcanicum</i> Cogn.                             | Michelangeli, F. A., 718 (BH)    | Costa Rica    | JQ730114 | JQ730326         | JQ730536         |
| <i>Nepsera aquatica</i> (Aubl.) Naudin                          | Struwe, L., 1158 (NY)            | Puerto Rico   | JQ730115 | JQ730327         | JQ730537         |
| <i>Osbeckia australiana</i> Naudin                              | Brennan, K. G., 7008 (NY)        | Australia     | JQ730116 | JQ730328         | JQ730538         |
| <i>Osbeckia courtalensis</i> Gamble                             | Klackenberg, 376 (NY)            | India         | JQ730117 | –                | –                |
| <i>Osbeckia nepalensis</i> Hook.                                | Penneys, D. S., 1986 (CAS)       | China         | JQ730118 | JQ730329         | JQ730539         |
| <i>Osbeckia stellata</i> Buch.-Ham. ex Ker Gawl.                | Penneys, D. S., 1969 (CAS)       | China         | JQ730119 | JQ730330         | JQ730540         |
| <i>Pachyloma huberioides</i> (Naudin) Triana                    | Caddah, M.K., 558 (NY)           | Brazil        | JQ730120 | JQ730331         | JQ730541         |
| <i>Physeterostemon tomasii</i> Amorim, Michelangeli & Goldenb.  | Amorim, A., 5054 (NY)            | Brazil        | JQ730121 | JQ730332         | JQ730542         |
| <i>Pilocosta campanensis</i> (Almeda & Whiffin) Almeda          | Penneys, D. S., 1647 (FLAS)      | Panama        | JQ730122 | JQ730333         | JQ730543         |
| <i>Pilocosta nana</i> (Standl.) Almeda & Whiffin                | Moran, R. C., 6928 (NY)          | Costa Rica    | JQ730123 | JQ730334         | JQ730544         |
| <i>Pilocosta nubicola</i> Almeda                                | Penneys, D. S., 1775 (FLAS)      | Costa Rica    | JQ730124 | JQ730335         | JQ730545         |
| <i>Pilocosta oerstedii</i> (Triana) Almeda & Whiffin            | Kriebel, R., 5412 (NY)           | Costa Rica    | JQ730125 | JQ730336         | JQ730546         |
| <i>Pterogastra divaricata</i> (Bonpl.) Naudin                   | Michelangeli, F. A., 540 (BH)    | Venezuela     | JQ730126 | JQ730337         | JQ730547         |
| <i>Pterogastra minor</i> Naudin                                 | Romero, G. A., 1682 (CAS)        | Brazil        | JQ730127 | JQ730338         | JQ730548         |
| <i>Pterolepis</i> sp.                                           | Nee, M., 55383 (NY)              | Bolivia       | JQ730133 | JQ730344         | JQ730554         |
| <i>Pterolepis alpestris</i> (DC.) Triana                        | Almeda, F., 8469 (CAS)           | Brazil        | JQ730128 | JQ730339         | JQ730549         |
| <i>Pterolepis glomerata</i> (Rottb.) Miq.                       | Martin, C. V., 419 (NY)          | French Guiana | JQ730129 | JQ730340         | JQ730550         |
| <i>Pterolepis parnasiifolia</i> (DC.) Triana                    | Almeda, F., 8306 (CAS)           | Brazil        | JQ730130 | JQ730341         | JQ730551         |
| <i>Pterolepis repanda</i> (DC.) Triana                          | Almeda, F., 7731 (CAS)           | Brazil        | JQ730131 | JQ730342         | JQ730552         |
| <i>Pterolepis rotundifolia</i> Wurdack                          | Almeda, F., 8290 (CAS)           | Brazil        | JQ730132 | JQ730343         | JQ730553         |
| <i>Rhexia alifanus</i> Walter                                   |                                  |               | DQ985623 | –                | –                |
| <i>Rhexia aristosa</i> Britton                                  | Naczi, R. F. C., 12065 (NY)      | USA           | JQ730134 | JQ730345         | JQ730555         |
| <i>Rhexia cubensis</i> Griseb.                                  |                                  |               | DQ985627 | –                | –                |
| <i>Rhexia lutea</i> Walter                                      |                                  |               | DQ985628 | –                | –                |
| <i>Rhexia mariana</i> L.                                        | Longbottom, W. D., 11730 (NY)    | USA           | JQ730135 | –                | JQ730556         |
| <i>Rhexia nashii</i> Small                                      |                                  |               | DQ985662 | –                | –                |
| <i>Rhexia nutallii</i> C.W.James                                |                                  |               | DQ985634 | –                | –                |
| <i>Rhexia parviflora</i> Chapm.                                 |                                  |               | DQ985636 | –                | –                |
| <i>Rhexia petiolata</i> Walter                                  |                                  |               | DQ985637 | –                | –                |
| <i>Rhexia salicifolia</i> Kral & Bostick                        |                                  |               | DQ985639 | –                | –                |
| <i>Rhexia virginica</i> L.                                      | Michelangeli, F. A., 1448 (NY)   | USA           | JQ730136 | JQ730346         | JQ730557         |
| <i>Rhynchanthera bracteata</i> Triana                           | Zenteno, F., 8801 (NY)           | Bolivia       | JQ730137 | JQ730347         | JQ730558         |
| <i>Rhynchanthera grandiflora</i> (Aubl.) DC.                    | Michelangeli, F. A., 541 (BH)    | Venezuela     | JQ730138 | JQ730348         | JQ730559         |
| <i>Rhynchanthera serrulata</i> (Rich.) DC.                      | Michelangeli, F. A., 828 (BH)    | Venezuela     | AY460435 | JQ730349         | JQ730560         |
| <i>Rousseauxia andringitrensis</i> (H.Perrier) Jacq.-Fél.       | Almeda, F., 9390 (CAS)           | Madagascar    | JQ730139 | JQ730350         | JQ730561         |
| <i>Rousseauxia minimifolia</i> (Jum. & H.Perrier) Jacq.-Fél.    | Almeda, F., 8704 (CAS)           | Madagascar    | JQ730140 | JQ730351         | JQ730562         |



APPENDIX *Continued*

| Species                                                          | Collector, number<br>(herbarium)   | Provenance    | nrITS    | <i>accd-psaI</i> | <i>psbK-psbL</i> |
|------------------------------------------------------------------|------------------------------------|---------------|----------|------------------|------------------|
| <i>Sandemania hoehnei</i> (Cogn.)<br>Wurdack                     | Goldenberg, R., 1007 (NY)          | Brazil        | JQ730141 | JQ730352         | JQ730563         |
| <i>Siphanthera hostmanii</i> Cogn.                               | Wurdack, K. J., 4142 (NY)          | Guyana        | JQ730142 | JQ730353         | JQ730564         |
| <i>Svitramia hatschbachii</i> Wurdack                            | Guimarães, P., 391 (RB)            | Brazil        | JQ730143 | JQ730354         | JQ730565         |
| <i>Svitramia minor</i> R.Romero &<br>A.B.Martins                 | Guimarães, P., 390 (RB)            | Brazil        | JQ730144 | JQ730355         | JQ730566         |
| <i>Svitramia pulchra</i> Cham.                                   | Guimarães, P., 388 (RB)            | Brazil        | JQ730145 | JQ730356         | JQ730567         |
| <i>Svitramia</i> sp. ined. 1                                     | Guimarães, P., 402 (RB)            | Brazil        | JQ730146 | JQ730357         | JQ730568         |
| <i>Svitramia</i> sp. ined. 2                                     | Guimarães, P., 400 (RB)            | Brazil        | JQ730147 | JQ730358         | JQ730569         |
| <i>Svitramia wurdackiana</i> R.Romero &<br>A.B.Martins           | Guimarães, P., 395 (RB)            | Brazil        | JQ730148 | JQ730359         | JQ730570         |
| <i>Tibouchina aegopogon</i> (Naud.) Cogn.                        | Almeda, F., 9523 (CAS)             | Brazil        | –        | –                | JQ730571         |
| <i>Tibouchina aemula</i> (Triana) Cogn.                          | Guimarães, P., 313 (RB)            | Brazil        | JQ730149 | JQ730360         | JQ730572         |
| <i>Tibouchina alpestris</i> Cogn.                                | Nee, M., 55379 (NY)                | Bolivia       | JQ730150 | JQ730361         | JQ730573         |
| <i>Tibouchina angustifolia</i> (Naudin)<br>Cogn.                 | Almeda, F., 9568 (CAS)             | Brazil        | JQ730151 | JQ730362         | JQ730574         |
| <i>Tibouchina arborea</i> (Gardn.) Cogn.                         | Guimarães, P., 324 (RB)            | Brazil        | JQ730152 | JQ730363         | JQ730575         |
| <i>Tibouchina arenaria</i> Cogn.                                 | Guimarães, P., 352 (RB)            | Brazil        | JQ730153 | JQ730364         | JQ730576         |
| <i>Tibouchina aspera</i> Aubl.                                   | Martin, C. V., 409 (NY)            | French Guiana | JQ730154 | JQ730365         | JQ730577         |
| <i>Tibouchina aspera</i> var <i>asperima</i><br>Cogn.            | Martin, C. V., 423 (NY)            | French Guiana | JQ730155 | JQ730366         | JQ730578         |
| <i>Tibouchina axillaris</i> Cogn.                                | Guimarães, P., 338 (RB)            | Brazil        | JQ730156 | JQ730367         | JQ730579         |
| <i>Tibouchina barnebyana</i> Wurdack                             | Almeda, F., 8262 (CAS)             | Brazil        | JQ730157 | JQ730368         | –                |
| <i>Tibouchina benthamiana</i> (Gardn.)<br>Cogn.                  | Almeda, F., 9759 (CAS)             | Brazil        | JQ730158 | JQ730369         | JQ730580         |
| <i>Tibouchina bicolor</i> (Naudin) Cogn.                         | Nee, M., 55307 (NY)                | Bolivia       | JQ730159 | JQ730370         | JQ730581         |
| <i>Tibouchina bipenicillata</i> (Naudin)<br>Cogn.                | Michelangelo, F. A., 735 (BH)      | Venezuela     | JQ730160 | JQ730371         | JQ730582         |
| <i>Tibouchina blanchetiana</i> Cogn.                             | Santos, A. K. A., 332 (UFB)        | Brazil        | JQ730161 | JQ730372         | –                |
| <i>Tibouchina boudetii</i> P.J.F.Guim. &<br>Goldenb.             | Kollman & Goldenberg, 8563<br>(NY) | Brazil        | JQ730162 | JQ730373         | JQ730583         |
| <i>Tibouchina breedlovei</i> Wurdack                             | Kelly, L., 1361 (CAS)              | Mexico        | JQ730163 | JQ730374         | JQ730584         |
| <i>Tibouchina candolleana</i> (DC.) Cogn.                        | Lima, J., 711 (UPCB)               | Brazil        | JQ730164 | JQ730375         | JQ730585         |
| <i>Tibouchina cardinalis</i> (Bonpl.) Cogn.                      | Guimarães, P., 407 (RB)            | Brazil        | JQ730165 | JQ730376         | JQ730586         |
| <i>Tibouchina castellensis</i> Brade                             | Goldenberg, R., 1071 (NY)          | Brazil        | JQ730166 | JQ730377         | JQ730587         |
| <i>Tibouchina cerastifolia</i> (Naudin)<br>Cogn.                 | Varassin, I. G., 96 (UPCB)         | Brazil        | JQ730167 | –                | JQ730588         |
| <i>Tibouchina chamaecistus</i> (Naudin)<br>Cogn.                 | Penneys, D. S., 1276 (FLAS)        | Martinique    | JQ730168 | JQ730378         | JQ730589         |
| <i>Tibouchina ciliaris</i> (Vent.) Cogn.                         | Kriebel, R., 5461 (NY)             | Costa Rica    | JQ730169 | –                | JQ730590         |
| <i>Tibouchina cinerea</i> Cogn.                                  | Almeda, F., 9843 (CAS)             | Brazil        | JQ730170 | JQ730379         | JQ730591         |
| <i>Tibouchina citrina</i> (Naudin) Cogn.                         | Nee, M., 55308 (NY)                | Bolivia       | JQ730171 | JQ730380         | JQ730592         |
| <i>Tibouchina clavata</i> (Pers.) Wurdack                        | Santos, A. K. A., 696 (UFB)        | Brazil        | JQ730172 | JQ730381         | JQ730593         |
| <i>Tibouchina clidemiodes</i> (O.Berg ex<br>Triana) Cogn.        | Goldenberg, R., 1439 (NY)          | Brazil        | JQ730173 | JQ730382         | –                |
| <i>Tibouchina clinopodifolia</i> (DC.) Cogn.                     | Goldenberg, R., 774 (NY)           | Brazil        | JQ730174 | JQ730383         | JQ730594         |
| <i>Tibouchina confertiflora</i> (Naudin)<br>Cogn.                | Nee, M., 55377 (NY)                | Bolivia       | JQ730175 | JQ730384         | JQ730595         |
| <i>Tibouchina corymbosa</i> (Raddi) Cogn.                        | Guimarães, P., 327 (RB)            | Brazil        | JQ730176 | JQ730385         | JQ730596         |
| <i>Tibouchina cristata</i> Brade                                 | Baumgratz, J. F. A., 819 (R)       | Brazil        | JQ730177 | JQ730386         | JQ730597         |
| <i>Tibouchina cryptadena</i> Gleason                             | Michelangelo, F. A., 708 (BH)      | Venezuela     | JQ730178 | JQ730387         | JQ730598         |
| <i>Tibouchina dubia</i> (Cham.) Cogn.                            | Varassin, I. G., 101 (UPCB)        | Brazil        | JQ730179 | JQ730388         | JQ730599         |
| <i>Tibouchina estrellensis</i> (Raddi) Cogn.                     | Guimarães, P., 340 (RB)            | Brazil        | JQ730180 | JQ730389         | JQ730600         |
| <i>Tibouchina fissinervia</i> DC.                                | Guimarães, P., 351 (RB)            | Brazil        | JQ730181 | JQ730390         | JQ730601         |
| <i>Tibouchina fothergillae</i> (Schrank &<br>Mart. ex DC.) Cogn. | Guimarães, P., 314 (RB)            | Brazil        | JQ730182 | JQ730391         | JQ730602         |
| <i>Tibouchina foveolata</i> Cogn.                                | Guimarães, P., 350 (RB)            | Brazil        | JQ730183 | JQ730392         | JQ730603         |

APPENDIX *Continued*

| Species                                                                | Collector, number<br>(herbarium) | Provenance | nrITS    | <i>accd-psaI</i> | <i>psbK-psbL</i> |
|------------------------------------------------------------------------|----------------------------------|------------|----------|------------------|------------------|
| <i>Tibouchina fraterna</i> N.E.Br.                                     | Michelangeli, F. A., 512 (BH)    | Venezuela  | JQ730184 | JQ730393         | JQ730604         |
| <i>Tibouchina frigidula</i> (DC.) Cogn.                                | Guimarães, P., 394 (RB)          | Brazil     | JQ730185 | JQ730394         | JQ730605         |
| <i>Tibouchina gardneriana</i> (Triana)<br>Cogn.                        | Guimarães, P., 305 (RB)          | Brazil     | JQ730186 | JQ730395         | JQ730606         |
| <i>Tibouchina gayana</i> (Naudin) Cogn.                                | Nee, M., 55380 (NY)              | Bolivia    | JQ730187 | JQ730396         | JQ730607         |
| <i>Tibouchina geitneriana</i> (Schltdl.)<br>Cogn.                      | Capote I., 852 (NY)              | Venezuela  | JQ730188 | JQ730397         | JQ730608         |
| <i>Tibouchina gleasoniana</i> Wurdack                                  | Jaramillo, J., 7985 (NY)         | Colombia   | JQ730189 | –                | JQ730609         |
| <i>Tibouchina gracilis</i> (Bonpl.) Cogn.                              | Guimarães, P., 336 (RB)          | Brazil     | JQ730190 | JQ730398         | JQ730610         |
| <i>Tibouchina granulosa</i> (Desr.) Cogn.                              | Guimarães, P., 378 (RB)          | Brazil     | JQ730191 | JQ730399         | JQ730611         |
| <i>Tibouchina grossa</i> (L.f.) Cogn.                                  | Zabala, J. C., 1 (NY)            | Colombia   | JQ730192 | JQ730400         | JQ730612         |
| <i>Tibouchina heteromalla</i> (D.Don)<br>Cogn.                         | Guimarães, P., 339 (RB)          | Brazil     | JQ730193 | JQ730401         | JQ730613         |
| <i>Tibouchina hieracioides</i> (DC.) Cogn.                             | Almeda, F., 8380 (CAS)           | Brazil     | JQ730194 | JQ730402         | JQ730614         |
| <i>Tibouchina hospita</i> (DC.) Cogn.                                  | Baumgratz, J. F. A., 1008 (R)    | Brazil     | JQ730195 | JQ730403         | JQ730615         |
| <i>Tibouchina inopinata</i> Wurdack                                    | Kriebel, R., 5342 (NY)           | Costa Rica | JQ730196 | JQ730404         | JQ730616         |
| <i>Tibouchina itatiaiae</i> Cogn.                                      | Guimarães, P., 310 (RB)          | Brazil     | JQ730197 | JQ730405         | JQ730617         |
| <i>Tibouchina kleinii</i> Wurdack                                      | Almeda, F., 9868 (CAS)           | Brazil     | JQ730198 | JQ730406         | JQ730618         |
| <i>Tibouchina laevicaulis</i> Wurdack                                  | Guimarães, P., 412 (RB)          | Brazil     | JQ730199 | JQ730407         | JQ730619         |
| <i>Tibouchina laxa</i> (Desr.) Cogn.                                   | Harling, G., 23570 (NY)          | Ecuador    | JQ730200 | JQ730408         | JQ730620         |
| <i>Tibouchina lepidota</i> (Bonpl.) Baill.                             | Morales, M. E., sn (UPTC)        | Colombia   | JQ730201 | JQ730409         | JQ730621         |
| <i>Tibouchina lindeniana</i> Cogn.                                     | Michelangeli, F. A., 1269 (NY)   | Brazil     | JQ730202 | JQ730410         | JQ730622         |
| <i>Tibouchina llanorum</i> Wurdack                                     | Michelangeli, F. A., 736 (BH)    | Venezuela  | JQ730203 | JQ730411         | JQ730623         |
| <i>Tibouchina longifolia</i> (Vahl) Baill.                             | Michelangeli, F. A., 816 (BH)    | Venezuela  | JQ730204 | JQ730412         | JQ730624         |
| <i>Tibouchina macrochiton</i> (Mart. ex<br>DC.) Cogn.                  | Guimarães, P., 320 (RB)          | Brazil     | JQ730205 | JQ730413         | JQ730625         |
| <i>Tibouchina manicata</i> Cogn.                                       | Guimarães, P., 328 (RB)          | Brazil     | JQ730206 | JQ730414         | JQ730626         |
| <i>Tibouchina martialis</i> (Cham.) Cogn.                              | Goldenberg, R., 821 (NY)         | Brazil     | JQ730207 | JQ730415         | JQ730627         |
| <i>Tibouchina martiusiana</i> (DC.) Cogn.                              | Guimarães, P., 335 (RB)          | Brazil     | JQ730208 | JQ730416         | JQ730628         |
| <i>Tibouchina melanocalyx</i> R. Romero,<br>P. J. F. Guimaraes & Leoni | Guimarães, P., 341 (RB)          | Brazil     | JQ730209 | JQ730417         | JQ730629         |
| <i>Tibouchina microphylla</i> Cogn. ex<br>Schwacke                     | Guimarães, P., 344 (RB)          | Brazil     | JQ730210 | JQ730418         | JQ730630         |
| <i>Tibouchina minor</i> Cogn.                                          | Guimarães, P., 393 (RB)          | Brazil     | JQ730211 | JQ730419         | JQ730631         |
| <i>Tibouchina mollis</i> (Bonpl.) Cogn.                                | Penneys, D. S., 1895 (FLAS)      | Ecuador    | JQ730212 | JQ730420         | JQ730632         |
| <i>Tibouchina mutabilis</i> Cogn.                                      | Lobão, A., 1450 (RB)             | Brazil     | JQ730213 | JQ730421         | JQ730633         |
| <i>Tibouchina naudiniana</i> (Decne)<br>Cogn.                          | CULTIVATED NY, (NY)              | USA*       | JQ730214 | JQ730422         | JQ730634         |
| <i>Tibouchina nodosa</i> Wurdack                                       | Santos, A. K. A., 1049 (UFB)     | Brazil     | JQ730215 | JQ730423         | JQ730635         |
| <i>Tibouchina octopetala</i> Cogn.                                     | Salomon, J. C., 14934 (CAS)      | Brazil     | JQ730216 | JQ730424         | JQ730636         |
| <i>Tibouchina oreophilla</i> Wurdack                                   | Santos, A. K. A., 829 (UFB)      | Brazil     | JQ730217 | JQ730425         | JQ730637         |
| <i>Tibouchina ornata</i> (Sw.) Baill.                                  | Penneys, D. S., 1298 (FLAS)      | Dominica   | JQ730218 | JQ730426         | JQ730638         |
| <i>Tibouchina papyrus</i> (Pohl) Toledo                                | Guimarães, P., 380 (RB)          | Brazil     | JQ730219 | JQ730427         | JQ730639         |
| <i>Tibouchina pendula</i> Cogn.                                        | Penneys, D. S., 1893 (FLAS)      | Ecuador    | JQ730220 | JQ730428         | JQ730640         |
| <i>Tibouchina pereirae</i> Brade & Markgr.                             | Santos, A. K. A., 302 (UFB)      | Brazil     | JQ730221 | JQ730429         | JQ730641         |
| <i>Tibouchina pulchra</i> (Cham.) Cogn.                                | Baumgratz, J. F. A., 1068 (R)    | Brazil     | JQ730222 | JQ730430         | JQ730642         |
| <i>Tibouchina radula</i> Markgr.                                       | Goldenberg, R., 1281 (NY)        | Brazil     | JQ730223 | JQ730431         | JQ730643         |
| <i>Tibouchina ramboi</i> Brade                                         | Almeda, F., 9889 (CAS)           | Brazil     | JQ730224 | JQ730432         | JQ730644         |
| <i>Tibouchina salviaefolia</i> Cogn.                                   | Guimarães, P., 322 (RB)          | Brazil     | JQ730225 | JQ730433         | JQ730645         |
| <i>Tibouchina sebastianopolitana</i><br>(Raddi) Cogn.                  | Guimarães, P., 330 (RB)          | Brazil     | JQ730226 | JQ730434         | JQ730646         |
| <i>Tibouchina sellowiana</i> Cogn.                                     | Guimarães, P., 331 (RB)          | Brazil     | JQ730227 | JQ730435         | JQ730647         |
| <i>Tibouchina semidecandra</i> (Schrank &<br>Mart. ex DC.) Cogn.       | Goldenberg, R., 765 (NY)         | Brazil     | JQ730228 | JQ730436         | JQ730648         |
| <i>Tibouchina sp.</i>                                                  | Nee, M., 55287 (RB)              | Brazil     | JQ730230 | JQ730438         | JQ730650         |
| <i>Tibouchina sp. ined. 1</i>                                          | Goldenberg, R., 1143 (NY)        | Brazil     | JQ730231 | JQ730439         | JQ730651         |
| <i>Tibouchina sp. ined. 2</i>                                          | Goldenberg, R., 1150 (NY)        | Brazil     | JQ730232 | JQ730440         | JQ730652         |

APPENDIX *Continued*

| Species                                            | Collector, number<br>(herbarium) | Provenance | nrITS    | <i>accd-psaI</i> | <i>psbK-psbL</i> |
|----------------------------------------------------|----------------------------------|------------|----------|------------------|------------------|
| <i>Tibouchina sp. ined.</i> 3                      | Guimarães, P., 377 (NY)          | Bolivia    | JQ730229 | JQ730437         | JQ730649         |
| <i>Tibouchina stenocarpa</i> (DC.) Cogn.           | Nee, M., 55386 (NY)              | Bolivia    | JQ730233 | JQ730441         | JQ730653         |
| <i>Tibouchina striphnocalyx</i> (DC.)<br>Pittier   | Michelangeli, F. A., 379 (BH)    | Venezuela  | JQ730234 | JQ730442         | JQ730654         |
| <i>Tibouchina trichopoda</i> (DC.) Baill.          | Lobão, A, 1437 (RB)              | Brazil     | JQ730235 | JQ730443         | JQ730655         |
| <i>Tibouchina trinervia</i> Cogn.                  | Almeda, F., 9682 (CAS)           | Brazil     | –        | JQ730444         | JQ730656         |
| <i>Tibouchina urceolaris</i> (DC.) Cogn.           | Guimarães, P., 321 (RB)          | Brazil     | JQ730236 | JQ730445         | JQ730657         |
| <i>Tibouchina ursina</i> (Cham.) Cogn.             | Almeda, F., 9859 (CAS)           | Brazil     | JQ730237 | JQ730446         | JQ730658         |
| <i>Tibouchina valtheri</i> Cogn.                   | Almeda, F., 8443 (CAS)           | Brazil     | JQ730238 | JQ730447         | JQ730659         |
| <i>Tibouchina velutina</i> (Naudin) Cogn.          | Santos, A. K. A., 349 (UFB)      | Brazil     | JQ730239 | JQ730448         | JQ730660         |
| <i>Tibouchina wurdackii</i> Almeda &<br>Todzia     | Penneys, D. S., 1749 (FLAS)      | Panama     | JQ730240 | JQ730449         | JQ730661         |
| <i>Tibouchinopsis mirabilis</i> Brade &<br>Markgr. | Santos, A. K. A., 338 (UFB)      | Brazil     | JQ730241 | JQ730450         | JQ730662         |
| <i>Trembleya laniflora</i> Cogn.                   |                                  |            | AY553744 | –                | –                |
| <i>Trembleya parviflora</i> Cogn.                  | Goldenberg, R., 824 (NY)         | Brazil     | JQ730242 | JQ730451         | JQ730663         |
| <i>Trembleya pentagona</i> Naudin                  |                                  |            | AY553745 | –                | –                |
| <i>Tristemma coronatum</i> Benth.                  | Schmidt, H. H., 3386 (CAS)       | Ghana      | JQ730243 | JQ730452         | JQ730664         |
| <i>Tristemma hirtum</i> P. Beauv.                  | Smith, S., 1879 (US)             | Gabon      | JQ730244 | JQ730453         | JQ730665         |
| <i>Tristemma littorale</i> Benth.                  | Smith, S., 1725 (US)             | Gabon      | JQ730245 | JQ730454         | JQ730666         |
| <i>Tristemma mauritianum</i> J. F. Gmel.           | Almeda, F., 8021 (CAS)           | Madagascar | JQ730246 | JQ730455         | JQ730667         |

\*Collected in cultivation outside native range.

–, locus not sequenced.
